# Supplementary material for: Reductive amination/cyclization of levulinic acid to pyrrolidones versus pyrrolidines by switching the catalyst from AlCl3 to RuCl3 under mild conditions
Source: Royal Society of Chemistry journal article supplement (doi:10.1039/c7gc00999b), 2017-01-01
Supplement: c7gc00999b1.pdf [file c7gc00999b1.pdf]

## Reductive Amination/Cyclization of Levulinic Acid to Pyrrolidones versus Pyrrolidines by Switching the Catalyst from $\text{AlCl}_3$ to $\text{RuCl}_3$ under mild conditions

Cailing Wu<sup>a,b</sup>, Xiaoying Luo<sup>a,b</sup>, Hongye Zhang<sup>a</sup>, Xinwei Liu<sup>a,b</sup>, Guipeng Ji<sup>a,b</sup>, Zhenghui Liu<sup>a,b</sup> and Zhimin Liu<sup>a,b\*</sup>

<sup>a</sup>Beijing National Laboratory for Molecular Sciences, Key Laboratory of Colloid, Interface and Thermodynamics, CAS Research/Education Center for Excellence in Molecular Sciences, Institute of Chemistry, Chinese Academy of Sciences, Beijing 100190, China;

<sup>b</sup>University of Chinese Academy of Sciences, Beijing 100049, China.

E-mail: liuzm@iccas.ac.cn

### Table of contents

|                                                                                                                      |    |
|----------------------------------------------------------------------------------------------------------------------|----|
| 1. General Information .....                                                                                         | 1  |
| 2. Typical procedures for the reductive amination reaction of LA to pyrrolidones.....                                | 2  |
| 3. Typical procedures for the reductive amination reaction of LA to cyclic amines.....                               | 2  |
| 4. Synthesis of 2-methyl-1-phenylpyrrolidine (1c) using 5-methyl-1-phenylpyrrolidin-2-one (1b) as the substrate..... | 2  |
| 5. Screening of Reductants using $\text{RuCl}_3 \cdot 3\text{H}_2\text{O}$ as the catalyst .....                     | 3  |
| 6. GC-MS spectrum of the mixture of LA, aniline and $\text{AlCl}_3$ .....                                            | 3  |
| 7. NMR data of the resultant pyrrolidones.....                                                                       | 4  |
| 8. NMR data of the resultant pyrrolidines .....                                                                      | 8  |
| 9. NMR spectra of the products.....                                                                                  | 11 |

### 1. General information

All reagents and solvents were purchased from commercial sources (J&K, Beijing InnoChem Science & Technology Co., Energy Chemical ), and were used without further purification.

Liquid NMR spectra were recorded on Bruker 400 spectrometer using  $\text{CDCl}_3$  as the solvent. The reaction mixture was analyzed by means of GC (Agilent 4890D) with a FID detector and a nonpolar capillary column (DB-5) (30m×0.25mm×0.25μm). The column oven was temperature-programmed with a 2 min hold at 323 K, followed by the temperature increase to 528K at a rate of

15 K/min and kept at 538 K for 10 min. High-purity nitrogen was used as a carrier gas.

## 2. Typical procedures for the reductive amination reaction of LA to pyrrolidones

The reaction was conducted in a screw-capped vial (15 mL inner volume) equipped with a magnetic stirrer. Typically,  $\text{AlCl}_3 \cdot 6\text{H}_2\text{O}$  (0.05 mmol), amine (1.0 mmol), LA (1.0 mmol), and  $\text{PhSiH}_3$  (3.0 mmol) were successively added to the vial, and heated at 30°C for the desired time. After the reaction, the vial was cooled to room temperature. The yield of 5-methyl-1-phenylpyrrolidin-2-one was determined by GC with a FID detector, and the yields of other N-substituted pyrrolidinones were determined by  $^1\text{H}$  NMR using mesitylene as an internal standard. The crude mixture was diluted by ether and isolated by column chromatography on silica gel (eluent: petroleum ether and EtOAc).

## 3. Typical procedures for the reductive amination reaction of LA to cyclic amines

The reaction was conducted in a screw-capped vial (15 mL inner volume) equipped with a magnetic stirrer. Typically,  $\text{RuCl}_3 \cdot 3\text{H}_2\text{O}$  (0.01 mmol), amine (1.0 mmol), LA (1.0 mmol), and  $\text{PhSiH}_3$  (4.0 mmol) were successively added into the vial, and heated at 45°C for 24h. Then the vial was cooled to room temperature. The yield of 2-methyl-1-phenylpyrrolidine was determined by GC with a FID detector, and the yields of other N-substituted pyrrolidines were determined by  $^1\text{H}$  NMR using mesitylene as an internal standard. The crude mixture was diluted by ether and isolated by column chromatography on silica gel (eluent: petroleum ether and  $\text{CH}_2\text{Cl}_2$ ).

## 4. Synthesis of 2-methyl-1-phenylpyrrolidine (1c) using 5-methyl-1-phenylpyrrolidin-2-one (1b) as the substrate.

To a screw-capped vial (15 mL inner volume),  $\text{RuCl}_3 \cdot 3\text{H}_2\text{O}$  (0.01 mmol), 5-methyl-1-phenylpyrrolidin-2-one (1.0 mmol), and  $\text{PhSiH}_3$  (2.0 mmol) were added successively, and heated at 50°C for 24h. Then the vial was cooled to room temperature. The product yield was determined by GC with a FID detector.

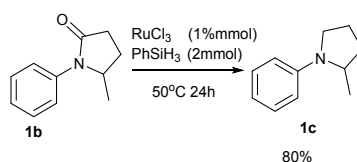

**Scheme S1:** Synthesis of 2-methyl-1-phenylpyrrolidine (1c) using 5-methyl-1-phenylpyrrolidin-2-one (1b) as the substrate.

## 5. Screening of reductants using RuCl<sub>3</sub>·3H<sub>2</sub>O as the catalyst

Table S1: Screening of reductants using RuCl<sub>3</sub>·3H<sub>2</sub>O as the catalyst<sup>a</sup>

| Entry | Reductant/n <sup>b</sup>                                | Yield <sup>c</sup> |    |
|-------|---------------------------------------------------------|--------------------|----|
|       |                                                         | 1b                 | 1c |
| 1     | EtSiH <sub>2</sub> /6                                   | 28                 | 0  |
| 2     | PhSiH <sub>2</sub> /6                                   | 0                  | 0  |
| 3     | EtO <sub>3</sub> SiH/12                                 | 50                 | 0  |
| 4     | Ph <sub>3</sub> SiH/12                                  | 0                  | 0  |
| 5     | (CH <sub>3</sub> O) <sub>2</sub> CH <sub>3</sub> SiH/12 | 78                 | 0  |
| 6     | (CH <sub>3</sub> ) <sub>2</sub> PhSiH/12                | 96                 | 0  |

<sup>a</sup> Reaction conditions: aniline (1mmol), LA (1mmol), RuCl<sub>3</sub>·3H<sub>2</sub>O (1 mol%). <sup>b</sup> n refers to mmol of hydrosilane. <sup>c</sup> Determined by GC analysis using dodecane as the internal standard.

## 6. The GC-MS spectra of the mixture of LA, aniline and AlCl<sub>3</sub>

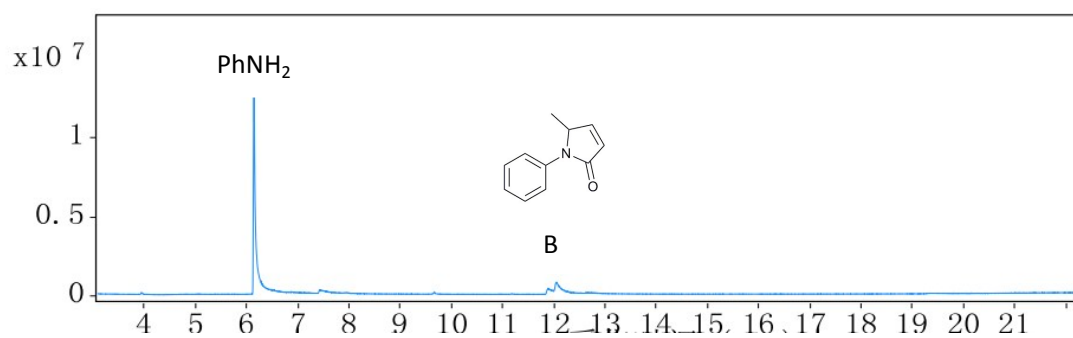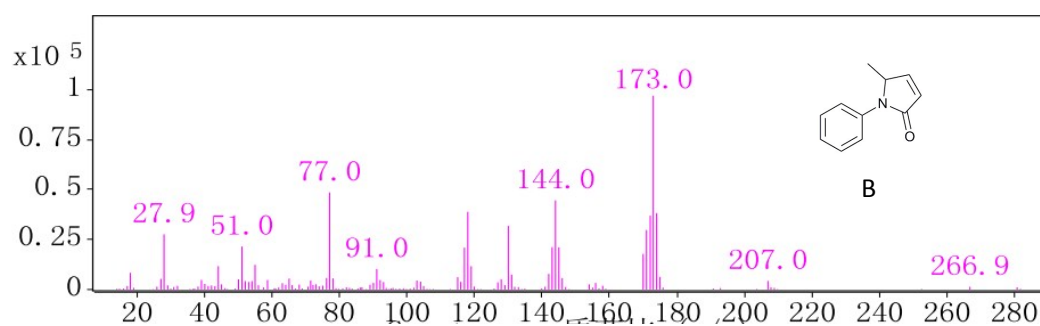

## 7. NMR data of the resultant pyrrolidones

### 5-Methyl-1-phenylpyrrolidin-2-one

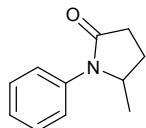

Isolated yield: 92%  $^1\text{H}$  NMR (400 MHz,  $\text{CDCl}_3$ )  $\delta$  7.45 – 7.31 (m, 4H), 7.20 (dd,  $J$  = 6.7, 4.7 Hz, 1H), 4.42 – 4.18 (m, 1H), 2.75 – 2.26 (m, 3H), 1.83 – 1.66 (m, 1H), 1.20 (d,  $J$  = 6.2 Hz, 3H) ppm.  $^{13}\text{C}$  NMR (101 MHz,  $\text{CDCl}_3$ )  $\delta$  174.18, 137.63, 128.97, 125.72, 124.04, 55.61, 31.35, 26.75, 20.16 ppm. HRMS (ESI) for  $\text{C}_{11}\text{H}_{13}\text{NO}$   $[\text{M}+\text{Na}]^+$  :calc.:198.0889. Found: 198.0889.

### 5-Methyl-1-(p-tolyl)pyrrolidin-2-one

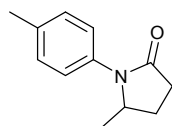

Isolated yield: 93%.  $^1\text{H}$  NMR (400 MHz,  $\text{CDCl}_3$ )  $\delta$  7.20 (m,  $J$  = 8.4 Hz, 4H), 4.23 (m,  $J$  = 13.0, 6.3 Hz, 1H), 2.56 (m,  $J$  = 16.8, 9.4, 6.9 Hz, 2H), 2.32 (s, 4H), 1.72 (m,  $J$  = 13.0, 9.4, 7.3 Hz, 1H), 1.17 (d,  $J$  = 6.2 Hz, 3H) ppm;  $^{13}\text{C}$  NMR (101 MHz,  $\text{CDCl}_3$ )  $\delta$  174.14, 135.55, 134.89, 129.52, 124.17, 55.71, 31.19, 26.73, 20.89, 20.12 ppm. HRMS (ESI) for  $\text{C}_{12}\text{H}_{15}\text{NNaO}$   $[\text{M}+\text{Na}]^+$  :calc.: 212.1046. Found: 212.1047.

### 5-Methyl-1-(m-tolyl)pyrrolidin-2-one

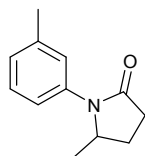

Isolated yield: 87%,  $^1\text{H}$  NMR (400 MHz,  $\text{CDCl}_3$ )  $\delta$  7.16 (m,  $J$  = 46.0, 26.8, 7.6 Hz, 4H), 4.26 (dd,  $J$  = 13.0, 6.4 Hz, 1H), 2.58 (m,  $J$  = 16.8, 9.4, 6.9 Hz, 2H), 2.36 (s, 4H), 1.80 – 1.68 (m, 1H), 1.19 (d,  $J$  = 6.2 Hz, 3H) ppm;  $^{13}\text{C}$  NMR (101 MHz,  $\text{CDCl}_3$ )  $\delta$  174.16, 138.78, 137.40, 128.70, 126.67, 125.03, 121.20, 55.74, 31.26, 26.72, 21.40, 20.15 ppm. HRMS (ESI) for  $\text{C}_{12}\text{H}_{15}\text{NNaO}$   $[\text{M}+\text{Na}]^+$  :calc.: 212.1046. Found: 212.1046.

### 5-Methyl-1-(o-tolyl)pyrrolidin-2-one

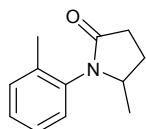

Isolated yield: 50%,  $^1\text{H}$  NMR (400 MHz,  $\text{CDCl}_3$ )  $\delta$  7.24 (dt,  $J$  = 22.4, 4.6 Hz, 3H), 7.12 – 7.00 (m, 1H), 4.06 (d,  $J$  = 5.7 Hz, 1H), 2.68 – 2.32 (m, 3H), 2.22 (s, 3H), 1.86 – 1.70 (m, 1H), 1.11 (d,  $J$  = 6.2 Hz, 3H) ppm.  $^{13}\text{C}$  NMR (101 MHz,  $\text{CDCl}_3$ )  $\delta$  174.19, 136.43, 136.15, 131.14, 127.81, 126.67, 56.87, 30.88, 27.85, 20.29, 18.08 ppm. HRMS (ESI) for  $\text{C}_{12}\text{H}_{15}\text{NNaO}$   $[\text{M}+\text{Na}]^+$  :calc.: 212.1046. Found: 212.1047.

## 1-(4-Methoxyphenyl)-5-methylpyrrolidin-2-one

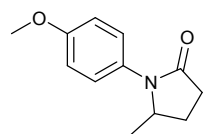

Isolated yield: 92%.  $^1\text{H}$  NMR (400 MHz,  $\text{CDCl}_3$ )  $\delta$  7.22 (d,  $J = 9.0$  Hz, 2H), 6.91 (d,  $J = 9.0$  Hz, 2H), 4.17 (dd,  $J = 13.3, 6.2$  Hz, 1H), 3.80 (s, 3H), 2.67 – 2.45 (m, 2H), 2.35 (dddd,  $J = 13.3, 9.3, 7.3, 6.1$  Hz, 1H), 1.79 – 1.66 (m, 1H), 1.17 (d,  $J = 6.2$  Hz, 3H) ppm;  $^{13}\text{C}$  NMR (101 MHz,  $\text{CDCl}_3$ )  $\delta$  174.28, 157.69, 130.40, 126.07, 114.34, 56.11, 55.42, 31.10, 26.83, 20.24 ppm. HRMS (ESI) for  $\text{C}_{12}\text{H}_{15}\text{NNaO}_2$   $[\text{M}+\text{Na}]^+$ : calc.: 228.0995. Found: 228.0997.

## 1-(4-Fluorophenyl)-5-methylpyrrolidin-2-one

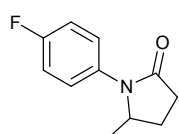

Isolated yield: 88%.  $^1\text{H}$  NMR (400 MHz,  $\text{CDCl}_3$ )  $\delta$  7.36 – 7.27 (m, 2H), 7.07 (t,  $J = 8.7$  Hz, 2H), 4.22 (dd,  $J = 13.3, 6.2$  Hz, 1H), 2.57 (ddd,  $J = 16.9, 9.4, 6.8$  Hz, 2H), 2.44 – 2.26 (m, 1H), 1.78 – 1.71 (m, 1H), 1.18 (d,  $J = 6.2$  Hz, 3H) ppm;  $^{13}\text{C}$  NMR (101 MHz,  $\text{CDCl}_3$ )  $\delta$  174.24, 160.43 (d,  $J = 245.4$  Hz), 133.54, 125.98 (d,  $J = 8.3$  Hz), 115.78 (d,  $J = 22.5$  Hz), 55.84, 31.10, 26.73, 20.10 ppm.  $^{19}\text{F}$  NMR (471 MHz,  $\text{CDCl}_3$ )  $\delta$  -136.11 ppm. HRMS (ESI) for  $\text{C}_{11}\text{H}_{12}\text{FNNaO}$   $[\text{M}+\text{Na}]^+$ : calc.: 216.0795. Found: 216.0796.

## 1-(4-Chlorophenyl)-5-methylpyrrolidin-2-one

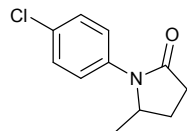

Isolated yield: 89%.  $^1\text{H}$  NMR (400 MHz,  $\text{CDCl}_3$ )  $\delta$  7.33 (s, 4H), 4.27 (dd,  $J = 13.1, 6.2$  Hz, 1H), 2.57 (ddd,  $J = 16.7, 9.5, 6.8$  Hz, 2H), 2.45 – 2.24 (m, 1H), 1.75 (dddd,  $J = 12.8, 9.5, 7.1, 5.6$  Hz, 1H), 1.20 (d,  $J = 6.2$  Hz, 3H) ppm;  $^{13}\text{C}$  NMR (101 MHz,  $\text{CDCl}_3$ )  $\delta$  174.17, 136.12, 130.86, 129.01, 124.89, 55.40, 31.18, 26.56, 19.95 ppm. HRMS (ESI) for  $\text{C}_{11}\text{H}_{12}\text{ClNNaO}$   $[\text{M}+\text{Na}]^+$ : calc.: 232.0500. Found: 232.0501.

## 1-(4-Bromophenyl)-5-methylpyrrolidin-2-one

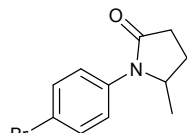

Isolated yield: 87%.  $^1\text{H}$  NMR (400 MHz,  $\text{CDCl}_3$ )  $\delta$  7.51 – 7.32 (m, 2H), 7.32 – 7.16 (m, 2H), 4.19 (dd,  $J = 12.2, 6.0$  Hz, 1H), 2.67 – 2.16 (m, 3H), 1.79 – 1.52 (m, 1H), 1.11 (dd,  $J = 6.1, 1.2$  Hz, 3H) ppm.  $^{13}\text{C}$  NMR (101 MHz,  $\text{CDCl}_3$ )  $\delta$  173.98, 136.55, 131.79, 124.99, 118.41, 55.15, 31.08, 26.38, 19.78 ppm. HRMS (ESI) for  $\text{C}_{11}\text{H}_{12}\text{BrNNaO}$   $[\text{M}+\text{Na}]^+$ : calc.: 275.9994. Found: 275.9995.

## 5-Methyl-1-(4-(trifluoromethyl)phenyl)pyrrolidin-2-one

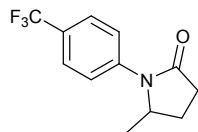

Isolated yield: 40%.  $^1\text{H}$  NMR ( $\text{CDCl}_3$ , 400 MHz):  $\delta$  7.64 (d,  $J = 8.8\text{Hz}$ , 2H), 7.58 (d,  $J = 8.8\text{Hz}$ , 2H), 4.39 (m, 1H), 2.69 (m, 1H), 2.60-2.52 (m, 1H), 2.41 (m, 1H), 1.80 (m, 1H), 1.26 (d,  $J = 6.0\text{Hz}$ , 3H) ppm;  $^{13}\text{C}$  NMR (101 MHz,  $\text{CDCl}_3$ )  $\delta$  149.83, 126.72, 122.82, 112.41 – 112.21 (m), 54.98, 31.51, 30.42, 26.52, 20.66 ppm.  $^{19}\text{F}$  NMR (471 MHz,  $\text{CDCl}_3$ )  $\delta$  -82.31. HRMS (ESI) for  $\text{C}_{12}\text{H}_{12}\text{F}_3\text{NNaO}$   $[\text{M}+\text{Na}]^+$ : calc.: 266.0763. Found: 266.0763.

## 1-Cyclohexyl-5-methylpyrrolidin-2-one

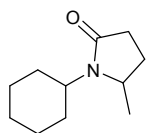

Isolated yield: 83%.  $^1\text{H}$  NMR (400 MHz,  $\text{CDCl}_3$ )  $\delta$  3.88 – 3.62 (m, 2H), 2.53 – 2.34 (m, 1H), 2.33 – 2.02 (m, 2H), 1.90 – 1.01 (m, 14H) ppm.  $^{13}\text{C}$  NMR (101 MHz,  $\text{CDCl}_3$ )  $\delta$  174.41, 77.32, 77.00, 76.68, 52.80, 52.47, 31.78, 30.27, 30.03, 27.43, 25.88 (d,  $J = 5.7\text{ Hz}$ ), 25.50, 22.31 ppm. HRMS (ESI) for  $\text{C}_{11}\text{H}_{19}\text{NNaO}$   $[\text{M}+\text{Na}]^+$ : calc.: 204.1359. Found: 204.1360.

## 1-Benzyl-5-methylpyrrolidin-2-one

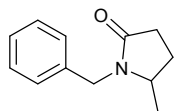

Isolated yield: 83%.  $^1\text{H}$  NMR (400 MHz,  $\text{CDCl}_3$ )  $\delta$  7.39 – 7.13 (m, 5H), 4.96 (d,  $J = 15.0\text{ Hz}$ , 1H), 3.99 (d,  $J = 15.0\text{ Hz}$ , 1H), 3.59 – 3.42 (m, 1H), 2.58 – 2.29 (m, 2H), 2.23 – 2.07 (m, 1H), 1.67 – 1.51 (m, 1H), 1.16 (d,  $J = 6.3\text{ Hz}$ , 3H) ppm.  $^{13}\text{C}$  NMR (101 MHz,  $\text{CDCl}_3$ )  $\delta$  174.94, 136.88, 128.60, 127.97, 127.39, 52.81, 43.90, 30.28, 26.67, 19.60 ppm. HRMS (ESI) for  $\text{C}_{12}\text{H}_{15}\text{NNaO}$   $[\text{M}+\text{Na}]^+$ : calc.: 212.1046. Found: 212.1046.

## 5-Methyl-1-(4-methylbenzyl)pyrrolidin-2-one

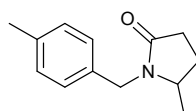

Isolated yield: 81%.  $^1\text{H}$  NMR (400 MHz,  $\text{CDCl}_3$ )  $\delta$  7.12 (s, 4H), 4.93 (d,  $J = 14.9\text{ Hz}$ , 1H), 3.92 (d,  $J = 14.9\text{ Hz}$ , 1H), 3.50 (dd,  $J = 13.5, 6.2\text{ Hz}$ , 1H), 2.43 (m,  $J = 25.5, 10.0, 7.0\text{ Hz}$ , 2H), 2.32 (s, 3H), 2.19 – 2.09 (m, 1H), 1.57 (m,  $J = 12.9, 9.6, 7.2, 5.9\text{ Hz}$ , 1H), 1.15 (d,  $J = 6.3\text{ Hz}$ , 3H) ppm;  $^{13}\text{C}$  NMR (101 MHz,  $\text{CDCl}_3$ )  $\delta$  174.83, 137.01, 133.76, 129.24, 127.96, 52.68, 43.57, 30.28, 26.62, 21.04, 19.55 ppm. HRMS (ESI) for  $\text{C}_{13}\text{H}_{17}\text{NNaO}$   $[\text{M}+\text{Na}]^+$ : calc.: 226.1202. Found: 226.1203.

## 6-Methyl-1-phenylpiperidin-2-one

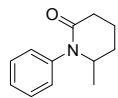

Isolated yield: 87%.  $^1\text{H NMR}$  (400 MHz,  $\text{CDCl}_3$ )  $\delta$  7.38 (t,  $J = 7.7$  Hz, 2H), 7.29 – 7.23 (m, 1H), 7.17 – 7.12 (m, 2H), 3.96 – 3.84 (m, 1H), 2.59 – 2.43 (m, 2H), 2.14 – 2.02 (m, 1H), 2.02 – 1.89 (m, 1H), 1.82 (m,  $J = 13.3, 9.7, 6.7, 3.0$  Hz, 1H), 1.70 (m,  $J = 8.5, 6.1, 2.9$  Hz, 1H), 1.05 (d,  $J = 6.4$  Hz, 3H) ppm.  $^{13}\text{C NMR}$  (101 MHz,  $\text{CDCl}_3$ )  $\delta$  170.35, 141.57, 129.14, 128.11, 127.10, 55.75, 32.76, 30.86, 20.89, 18.33 ppm. HRMS (ESI) for  $\text{C}_{12}\text{H}_{16}\text{NO}$   $[\text{M}+\text{H}]^+$ : calc.: 190.1226. Found: 190.1226.

## 6-Methyl-1-(p-tolyl)piperidin-2-one

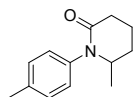

Isolated yield: 88%.  $^1\text{H NMR}$  (400 MHz,  $\text{CDCl}_3$ )  $\delta$  7.19 (d,  $J = 8.0$  Hz, 2H), 7.03 (d,  $J = 8.0$  Hz, 2H), 3.94 – 3.77 (m, 1H), 2.52 (t,  $J = 6.6$  Hz, 2H), 2.34 (s, 3H), 2.15 – 2.03 (m, 1H), 2.03 – 1.90 (m, 1H), 1.90 – 1.76 (m, 1H), 1.76 – 1.65 (m, 1H), 1.06 (d,  $J = 6.4$  Hz, 3H) ppm.  $^{13}\text{C NMR}$  (101 MHz,  $\text{CDCl}_3$ )  $\delta$  170.35, 138.95, 136.78, 129.81, 127.82, 55.73, 32.81, 30.86, 21.10, 20.89, 18.36 ppm. HRMS (ESI) for  $\text{C}_{13}\text{H}_{18}\text{NO}$   $[\text{M}+\text{H}]^+$ : calc.: 204.1383. Found: 204.1383.

## 1-(4-Methoxyphenyl)-6-methylpiperidin-2-one

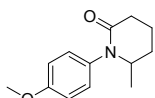

Isolated yield: 87%.  $^1\text{H NMR}$  (400 MHz,  $\text{CDCl}_3$ )  $\delta$  7.07 (d,  $J = 8.7$  Hz, 2H), 6.91 (d,  $J = 8.6$  Hz, 2H), 3.85 (dd,  $J = 12.1, 6.1$  Hz, 1H), 3.80 (s, 3H), 2.52 (t,  $J = 6.6$  Hz, 2H), 2.16 – 1.96 (m, 2H), 1.91 – 1.66 (m, 2H), 1.08 (d,  $J = 6.4$  Hz, 3H) ppm.  $^{13}\text{C NMR}$  (101 MHz,  $\text{CDCl}_3$ )  $\delta$  170.57, 158.26, 134.18, 128.94, 114.36, 55.84, 55.33, 32.67, 30.77, 20.78, 18.25 ppm. HRMS (ESI) for  $\text{C}_{13}\text{H}_{18}\text{NO}_2$   $[\text{M}+\text{H}]^+$ : calc.: 220.1332. Found: 220.1332.

## 1-(4-Chlorophenyl)-6-methylpiperidin-2-one

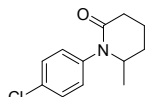

Isolated yield: 85%.  $^1\text{H NMR}$  (400 MHz,  $\text{CDCl}_3$ )  $\delta$  7.36 (d,  $J = 8.4$  Hz, 2H), 7.11 (d,  $J = 8.4$  Hz, 2H), 3.96 – 3.82 (m, 1H), 2.53 (t,  $J = 6.6$  Hz, 2H), 2.18 – 1.65 (m, 4H), 1.07 (d,  $J = 6.4$  Hz, 3H) ppm.  $^{13}\text{C NMR}$  (101 MHz,  $\text{CDCl}_3$ )  $\delta$  170.32, 139.99, 132.67, 129.33 (d,  $J = 12.5$  Hz), 55.69, 32.69, 30.78, 20.84, 18.27 ppm. HRMS (ESI) for  $\text{C}_{12}\text{H}_{15}\text{ClNO}$   $[\text{M}+\text{H}]^+$ : calc.: 224.0837. Found: 224.0836.

## 8. NMR data of the resultant pyrrolidines

### 2-Methyl-1-phenylpyrrolidine

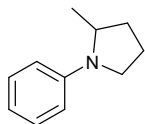

Isolated yield: 90%.  $^1\text{H}$  NMR (400 MHz,  $\text{CDCl}_3$ )  $\delta$  7.20 (t,  $J = 7.8$  Hz, 2H), 6.63 (t,  $J = 7.3$  Hz, 1H), 6.57 (d,  $J = 8.3$  Hz, 2H), 3.86 (p,  $J = 6.1$  Hz, 1H), 3.40 (dd,  $J = 11.6, 5.1$  Hz, 1H), 3.14 (dd,  $J = 16.4, 8.0$  Hz, 1H), 2.12 – 1.90 (m, 3H), 1.68 (dd,  $J = 10.1, 5.9$  Hz, 1H), 1.16 (d,  $J = 6.2$  Hz, 3H) ppm.  $^{13}\text{C}$  NMR (101 MHz,  $\text{CDCl}_3$ )  $\delta$  147.31, 129.22, 115.22, 111.85, 53.64, 48.21, 33.20, 23.36, 19.43 ppm. HRMS (ESI) for  $\text{C}_{11}\text{H}_{16}\text{N}$   $[\text{M}+\text{H}]^+$ : calc.: 224.0837. Found: 224.0836.

### 2-Methyl-1-(p-tolyl)pyrrolidine

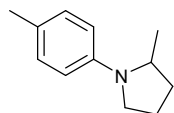

Isolated yield: 87%.  $^1\text{H}$  NMR (400 MHz,  $\text{CDCl}_3$ )  $\delta$  7.03 (d,  $J = 8.4$  Hz, 2H), 6.52 (d,  $J = 8.5$  Hz, 2H), 3.90 – 3.78 (m, 1H), 3.41 (dd,  $J = 11.4, 5.0$  Hz, 1H), 3.13 (dd,  $J = 16.4, 8.0$  Hz, 1H), 2.25 (s, 3H), 2.12 – 1.90 (m, 3H), 1.69 (dd,  $J = 4.7, 2.3$  Hz, 1H), 1.17 (d,  $J = 6.2$  Hz, 3H) ppm;  $^{13}\text{C}$  NMR (101 MHz,  $\text{CDCl}_3$ )  $\delta$  145.27, 129.63, 124.15, 111.85, 53.68, 48.40, 33.13, 23.31, 20.19, 19.47 ppm. HRMS (ESI) for  $\text{C}_{12}\text{H}_{18}\text{N}$   $[\text{M}+\text{H}]^+$ : calc.: 176.1434. Found: 176.1434.

### 2-Methyl-1-(m-tolyl)pyrrolidine

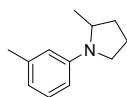

Isolated yield: 83%.  $^1\text{H}$  NMR (400 MHz,  $\text{CDCl}_3$ )  $\delta$  7.10 (t,  $J = 8.1$  Hz, 1H), 6.47 (d,  $J = 7.4$  Hz, 1H), 6.40 (d,  $J = 5.0$  Hz, 2H), 3.86 (p,  $J = 6.1$  Hz, 1H), 3.40 (dd,  $J = 11.7, 5.1$  Hz, 1H), 3.14 (dd,  $J = 16.4, 8.1$  Hz, 1H), 2.30 (s, 3H), 2.13 – 1.87 (m, 3H), 1.67 (dd,  $J = 9.4, 6.3$  Hz, 1H), 1.16 (d,  $J = 6.2$  Hz, 3H) ppm.  $^{13}\text{C}$  NMR (101 MHz,  $\text{CDCl}_3$ )  $\delta$  147.29, 138.75, 128.99, 116.11, 112.44, 109.00, 53.51, 48.15, 33.07, 23.25, 21.87, 19.41 ppm. HRMS (ESI) for  $\text{C}_{12}\text{H}_{18}\text{N}$   $[\text{M}+\text{H}]^+$ : calc.: 176.1434. Found: 176.1434.

### 2-Methyl-1-(o-tolyl)pyrrolidine

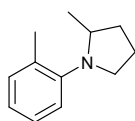

Isolated yield: 60%.  $^1\text{H}$  NMR (400 MHz,  $\text{CDCl}_3$ )  $\delta$  7.12 (t,  $J = 9.1$  Hz, 2H), 6.94 (d,  $J = 7.9$  Hz, 1H), 6.87 (t,  $J = 7.3$  Hz, 1H), 3.73 – 3.45 (m, 2H), 2.76 (m,  $J = 8.8, 4.5$  Hz, 1H), 2.27 (s,



3H), 2.11 (dd,  $J = 7.9, 2.7$  Hz, 1H), 1.83 (m,  $J = 16.8, 12.1, 8.1, 3.9$  Hz, 2H), 1.56 (m,  $J = 17.9, 8.9$  Hz, 1H), 0.99 (d,  $J = 6.0$  Hz, 3H) ppm.  $^{13}\text{C}$  NMR (101 MHz,  $\text{CDCl}_3$ )  $\delta$  148.56, 132.02, 131.23, 126.12, 121.32, 118.36, 55.01, 53.10, 33.84, 23.62, 19.58, 19.12 ppm. HRMS (ESI) for  $\text{C}_{12}\text{H}_{18}\text{N}$   $[\text{M}+\text{H}]^+$ : calc.: 176.1434. Found: 176.1434.

#### 1-(4-Fluorophenyl)-2-methylpyrrolidine

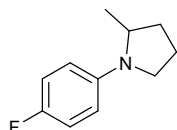

Isolated yield: 79%.  $^1\text{H}$  NMR (400 MHz,  $\text{CDCl}_3$ )  $\delta$  6.92 (t,  $J = 8.7$  Hz, 2H), 6.47 (dd,  $J = 9.0, 4.3$  Hz, 2H), 3.78 (dd,  $J = 12.5, 6.2$  Hz, 1H), 3.37 (dd,  $J = 11.1, 5.0$  Hz, 1H), 3.10 (dd,  $J = 16.0, 8.4$  Hz, 1H), 2.13 – 1.90 (m, 3H), 1.75 – 1.61 (m, 1H), 1.14 (d,  $J = 6.2$  Hz, 3H) ppm.  $^{13}\text{C}$  NMR (101 MHz,  $\text{CDCl}_3$ )  $\delta$  155.79, 153.48, 143.98, 115.55, 115.33, 112.17 (d,  $J = 7.1$  Hz), 53.99, 48.68, 33.18, 23.36, 19.31 ppm.  $^{19}\text{F}$  NMR (471 MHz,  $\text{CDCl}_3$ )  $\delta$  -151.18 ppm. HRMS (ESI) for  $\text{C}_{11}\text{H}_{15}\text{FN}$   $[\text{M}+\text{H}]^+$ : calc.: 180.1183. Found: 180.1184

#### 1-(4-Methoxyphenyl)-2-methylpyrrolidine

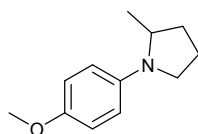

Isolated yield: 70%.  $^1\text{H}$  NMR (400 MHz,  $\text{CDCl}_3$ )  $\delta$  6.84 (d,  $J = 8.8$  Hz, 2H), 6.54 (d,  $J = 8.8$  Hz, 2H), 3.82 – 3.69 (m, 4H), 3.47 – 3.31 (m, 1H), 3.10 (q,  $J = 8.3$  Hz, 1H), 2.12 – 1.85 (m, 3H), 1.75 – 1.57 (m, 1H), 1.15 (d,  $J = 6.2$  Hz, 3H) ppm.  $^{13}\text{C}$  NMR (101 MHz,  $\text{CDCl}_3$ )  $\delta$  150.63, 142.42, 115.11, 112.76, 56.05, 54.09, 48.94, 33.26, 23.43, 19.65 ppm. HRMS (ESI) for  $\text{C}_{12}\text{H}_{18}\text{NO}$   $[\text{M}+\text{H}]^+$ : calc.: 192.1383. Found: 192.1383

#### N-(4-chlorophenyl)-2-methylpyrrolidine

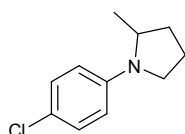

Isolated yield: 81%.  $^1\text{H}$  NMR (400 MHz,  $\text{CDCl}_3$ ):  $\delta$  7.15 (d,  $J = 7.5$  Hz, 2H), 6.46 (d,  $J = 7.5$  Hz, 2H), 3.85 (m,  $J = 6.2$  Hz, 1H), 3.39 (t,  $J = 8.1$  Hz, 1H), 3.16 (m,  $J = 16.2, 7.8$  Hz, 1H), 2.16-2.00 (m, 2H), 1.93 (m, 1H), 1.79-1.63 (m, 1H), 1.17 (d,  $J = 6.0$  Hz, 3H) ppm;  $^{13}\text{C}$  NMR (101 MHz,  $\text{CDCl}_3$ ):  $\delta$  145.83, 128.96, 119.89, 112.82, 53.80, 48.31, 33.09, 23.33, 19.15 ppm. HRMS (ESI) for  $\text{C}_{11}\text{H}_{15}\text{ClN}$   $[\text{M}+\text{H}]^+$ : calc.: 196.0888. Found: 196.0888

## 1-(4-Bromophenyl)-2-methylpyrrolidine

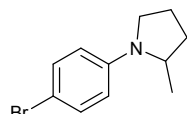

Isolated yield: 82%.  $^1\text{H}$  NMR (400 MHz,  $\text{CDCl}_3$ ):  $\delta$  7.50 (d, 2H), 6.39 (d, 2H), 3.55 (m,  $J = 6.4, 3.2$  Hz, 1H), 3.03 (m,  $J = 9.5, 7.6, 2.5$  Hz, 1H), 2.88 – 2.74 (m, 1H), 1.87 – 1.52 (m, 3H), 1.46 – 1.24 (m, 1H), 1.00 (d,  $J = 6.1$  Hz, 3H) ppm.  $^{13}\text{C}$  NMR (101 MHz,  $\text{CDCl}_3$ ):  $\delta$  146.23, 131.80, 113.41, 106.93, 53.79, 48.35, 33.21, 23.40, 19.17 ppm. HRMS (ESI) for  $\text{C}_{11}\text{H}_{15}\text{BrN}[\text{M}+\text{H}]^+$ : calc.: 240.0382. Found: 240.0383

## 2-Methyl-1-(4-(trifluoromethyl)phenyl)pyrrolidine

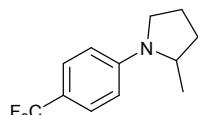

Isolated yield: 50%.  $^1\text{H}$  NMR (400 MHz,  $\text{CDCl}_3$ )  $\delta$  7.44 (d,  $J = 8.7$  Hz, 2H), 6.58 (d,  $J = 8.7$  Hz, 2H), 4.07 – 3.80 (m, 1H), 3.45 (dd,  $J = 9.5, 7.6$  Hz, 1H), 3.21 (d,  $J = 8.8$  Hz, 1H), 2.20 – 1.96 (m, 3H), 1.82 – 1.69 (m, 1H), 1.20 (d,  $J = 6.3$  Hz, 3H) ppm.  $^{13}\text{C}$  NMR (101 MHz,  $\text{CDCl}_3$ )  $\delta$  149.11, 126.73, 126.43, 124.05, 116.63, 116.30, 111.02, 53.68, 47.96, 32.98, 23.14, 18.84 ppm.  $^{19}\text{F}$  NMR (471 MHz,  $\text{CDCl}_3$ )  $\delta$  -80.60 ppm. HRMS (ESI) for  $\text{C}_{12}\text{H}_{15}\text{F}_3\text{N}[\text{M}+\text{H}]^+$ : calc.: 230.1151. Found: 230.1151.

## 1-Benzyl-2-methylpyrrolidine

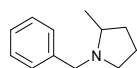

Isolated yield: 85%.  $^1\text{H}$  NMR (400 MHz,  $\text{CDCl}_3$ )  $\delta$  7.37 – 7.15 (m, 5H), 4.01 (d,  $J = 12.8$  Hz, 1H), 3.14 (d,  $J = 12.8$  Hz, 1H), 2.90 (t,  $J = 8.6$  Hz, 1H), 2.46 – 2.30 (m, 1H), 2.10 (q,  $J = 8.9$  Hz, 1H), 2.02 – 1.86 (m, 1H), 1.80 – 1.53 (m, 2H), 1.52 – 1.36 (m, 1H), 1.16 (d,  $J = 6.0$  Hz, 3H) ppm.  $^{13}\text{C}$  NMR (101 MHz,  $\text{CDCl}_3$ )  $\delta$  138.64, 128.03, 127.10, 125.70, 58.56, 57.34, 53.04, 31.76, 20.51, 18.17 ppm. HRMS (ESI) for  $\text{C}_{12}\text{H}_{18}\text{N}[\text{M}+\text{H}]^+$ : calc.: 176.1434. Found: 176.1434.

## 2-Methyl-1-phenylpiperidine

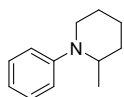

Isolated yield: 83%.  $^1\text{H}$  NMR (400 MHz,  $\text{CDCl}_3$ )  $\delta$  7.23 (t,  $J = 7.4$  Hz, 2H), 6.93 (d,  $J = 8.0$  Hz, 3H), 6.81 (t,  $J = 7.2$  Hz, 1H), 3.98 – 3.80 (m, 1H), 3.28 – 3.10 (m, 1H), 2.97 (dd,  $J = 15.3, 6.3$  Hz, 1H), 1.99 – 1.47 (m, 6H), 0.99 (d,  $J = 6.6$  Hz, 3H) ppm.  $^{13}\text{C}$  NMR (101 MHz,  $\text{CDCl}_3$ )  $\delta$  151.48, 128.99, 119.25, 117.73, 51.49, 45.19, 31.87, 26.16, 19.88, 13.98 ppm. HRMS (ESI) for  $\text{C}_{12}\text{H}_{18}\text{N}[\text{M}+\text{H}]^+$ : calc.: 176.1434. Found: 176.1434.

## 9. NMR spectra of the products

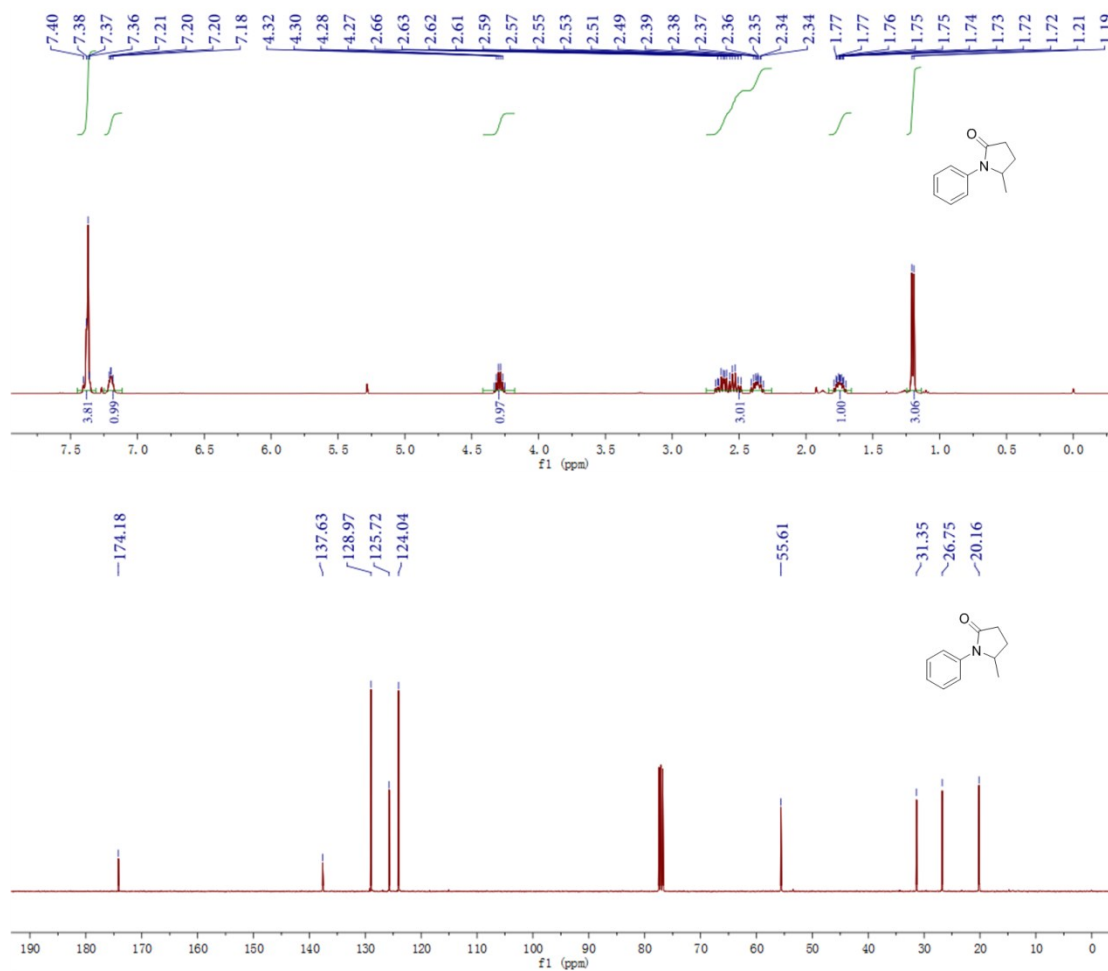

**Figure S1**  $^1\text{H}$  (top) and  $^{13}\text{C}$  (bottom) NMR spectra of 5-methyl-1-phenylpyrrolidin-2-one

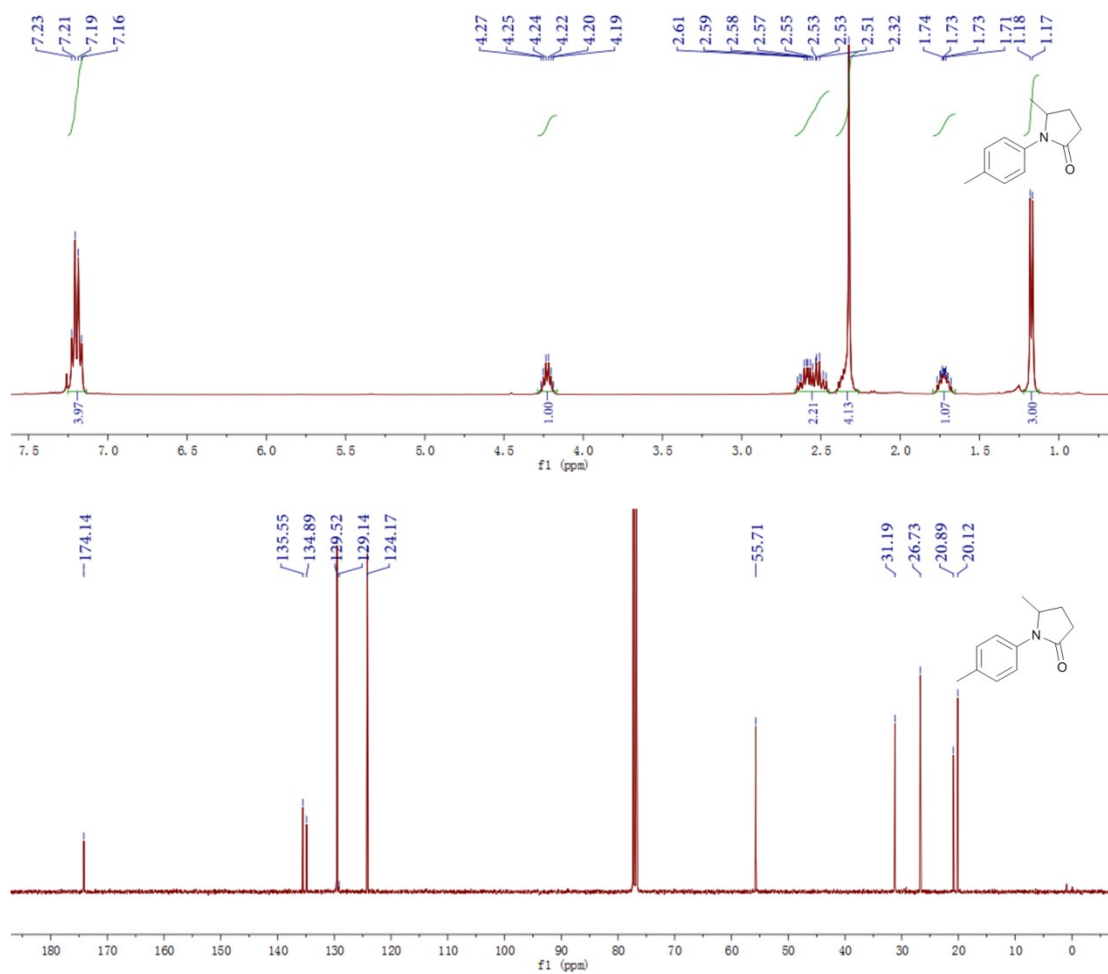

**Figure S2**  $^1\text{H}$  (top) and  $^{13}\text{C}$  (bottom) NMR spectra of 5-methyl-1-(p-tolyl)pyrrolidin-2-one

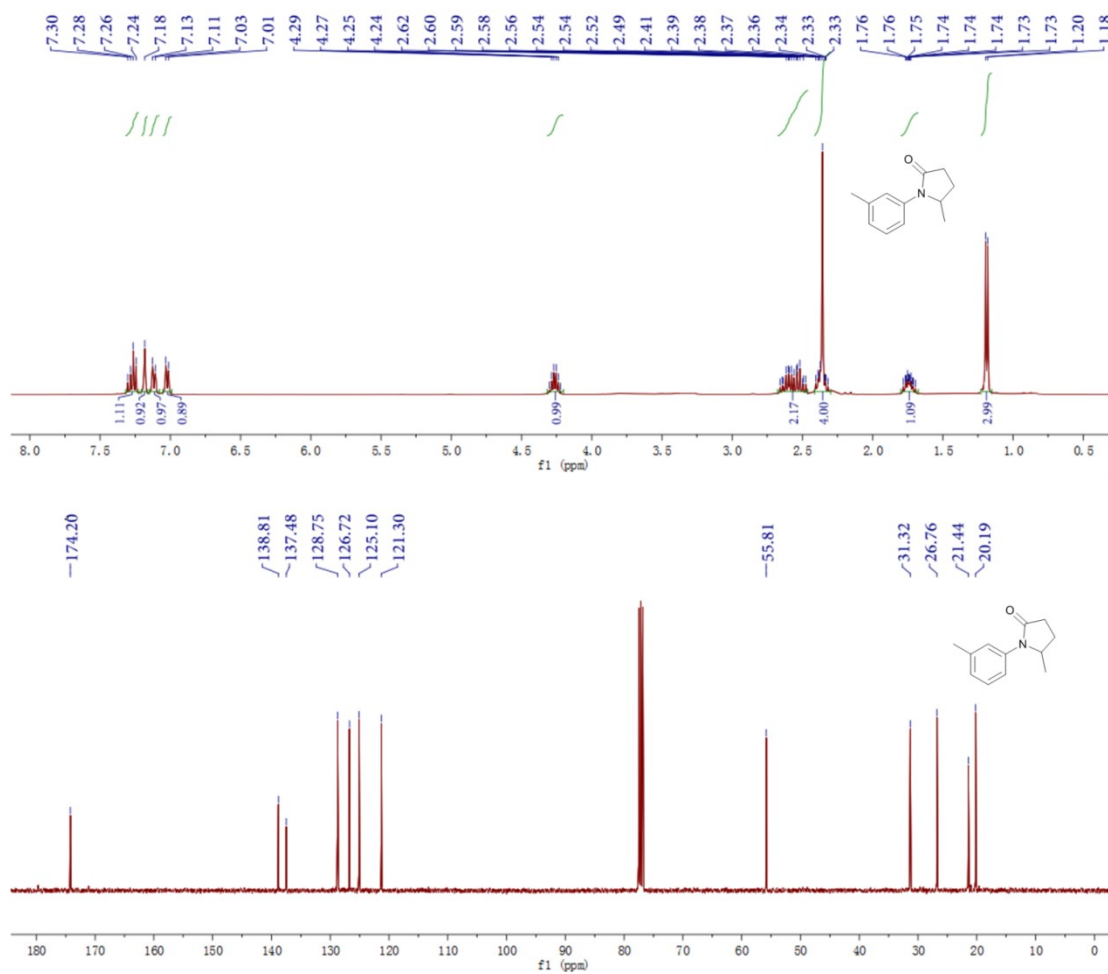

**Figure S3**  $^1\text{H}$  (top) and  $^{13}\text{C}$  (bottom) NMR spectra of 5-methyl-1-(m-tolyl)pyrrolidin-2-one

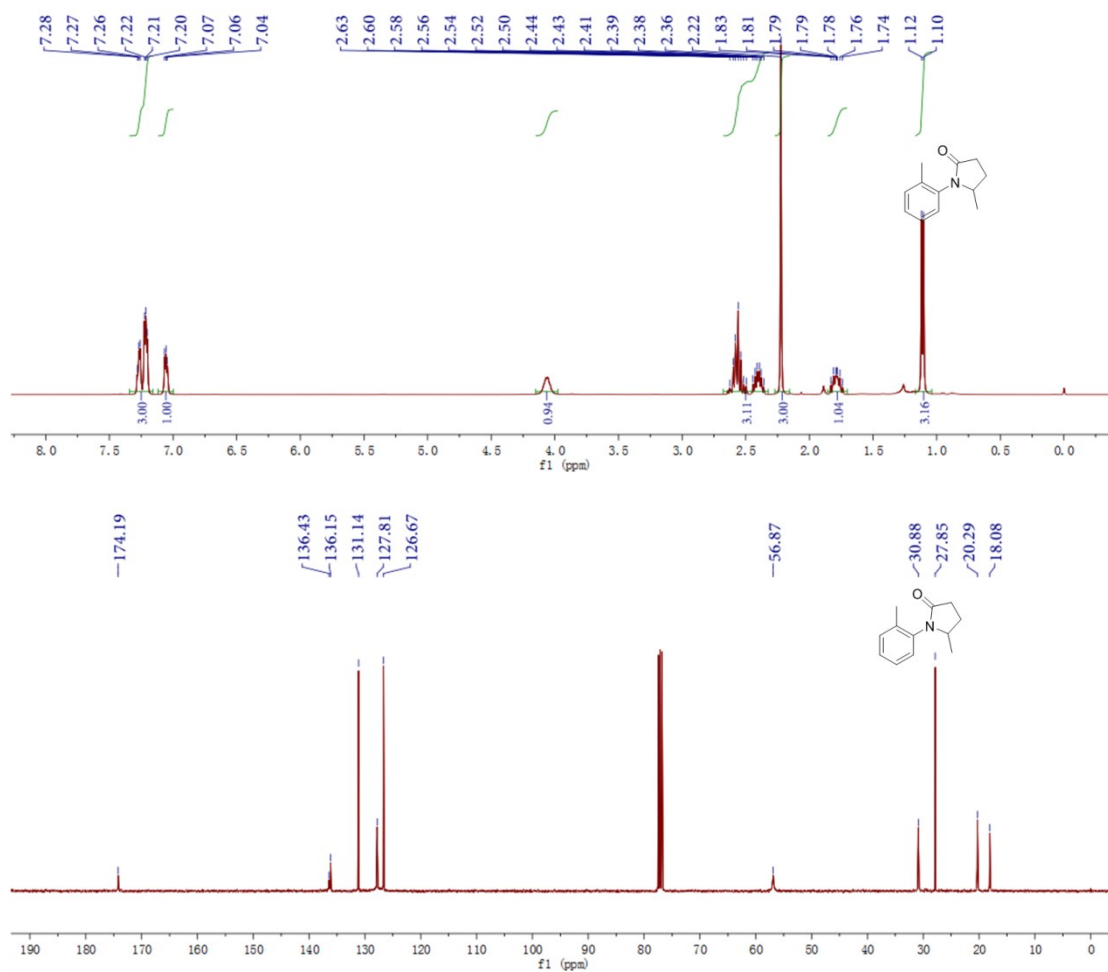

**Figure S4**  $^1\text{H}$  (top) and  $^{13}\text{C}$  (bottom) NMR spectra of 5-methyl-1-(o-tolyl)pyrrolidin-2-one

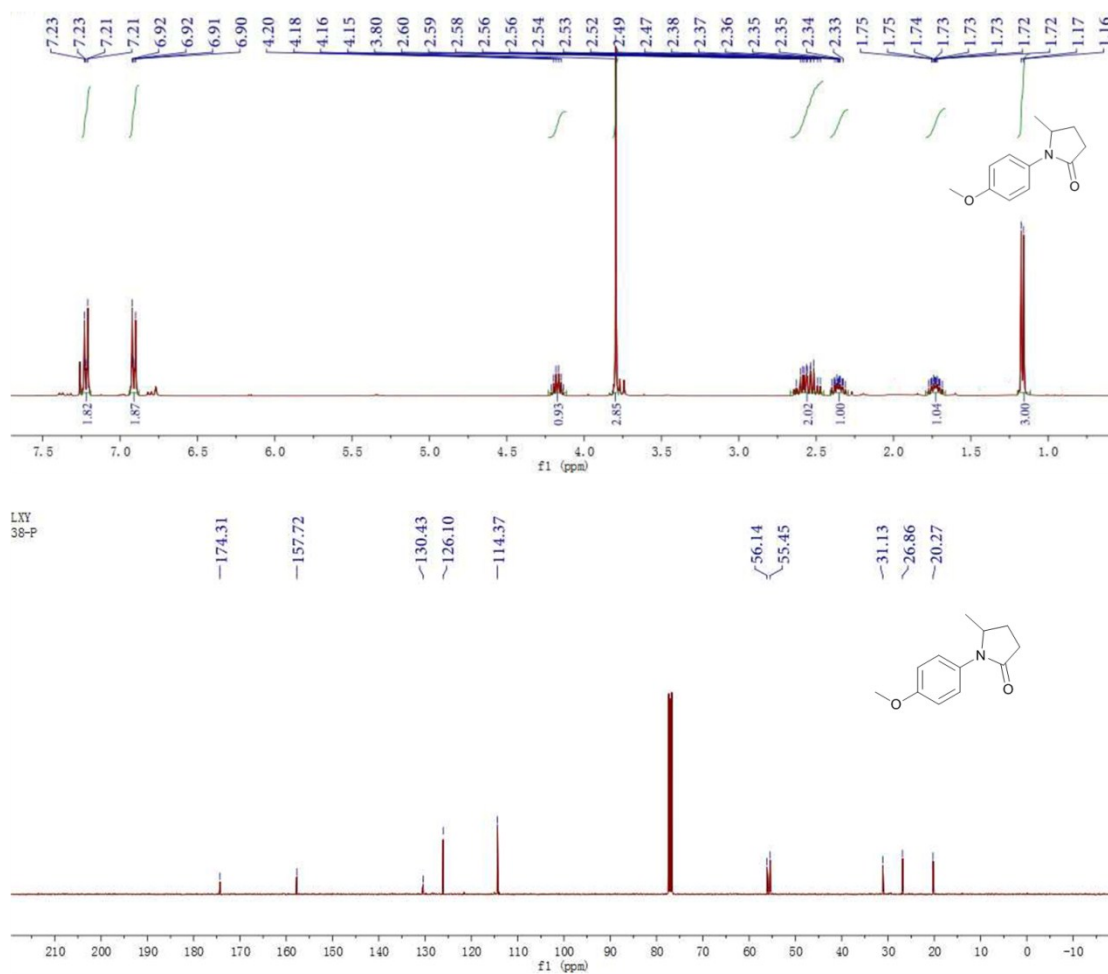

**Figure S5** <sup>1</sup>H (top) and <sup>13</sup>C (bottom) NMR spectra of 1-(4-methoxyphenyl)-5-methylpyrrolidin-2-one

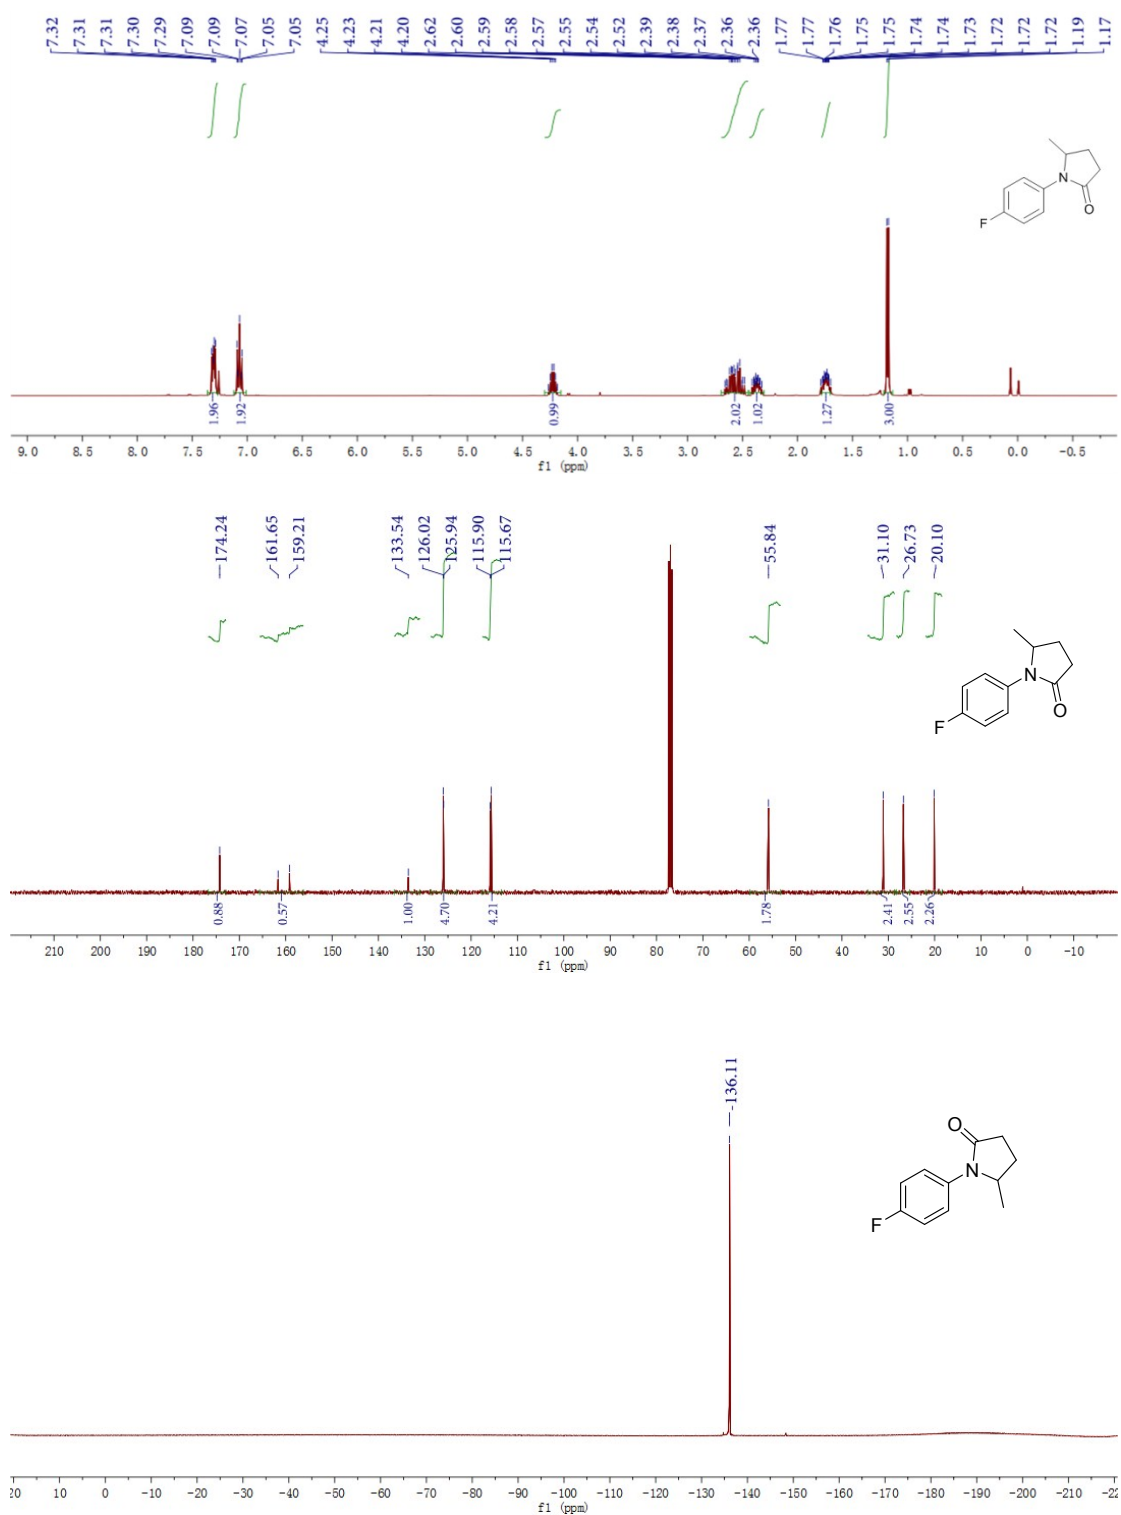

**Figure S6** <sup>1</sup>H (top), <sup>13</sup>C (middle) and <sup>19</sup>F (bottom) NMR spectra of 1-(4-fluorophenyl)-5-methylpyrrolidin-2-one



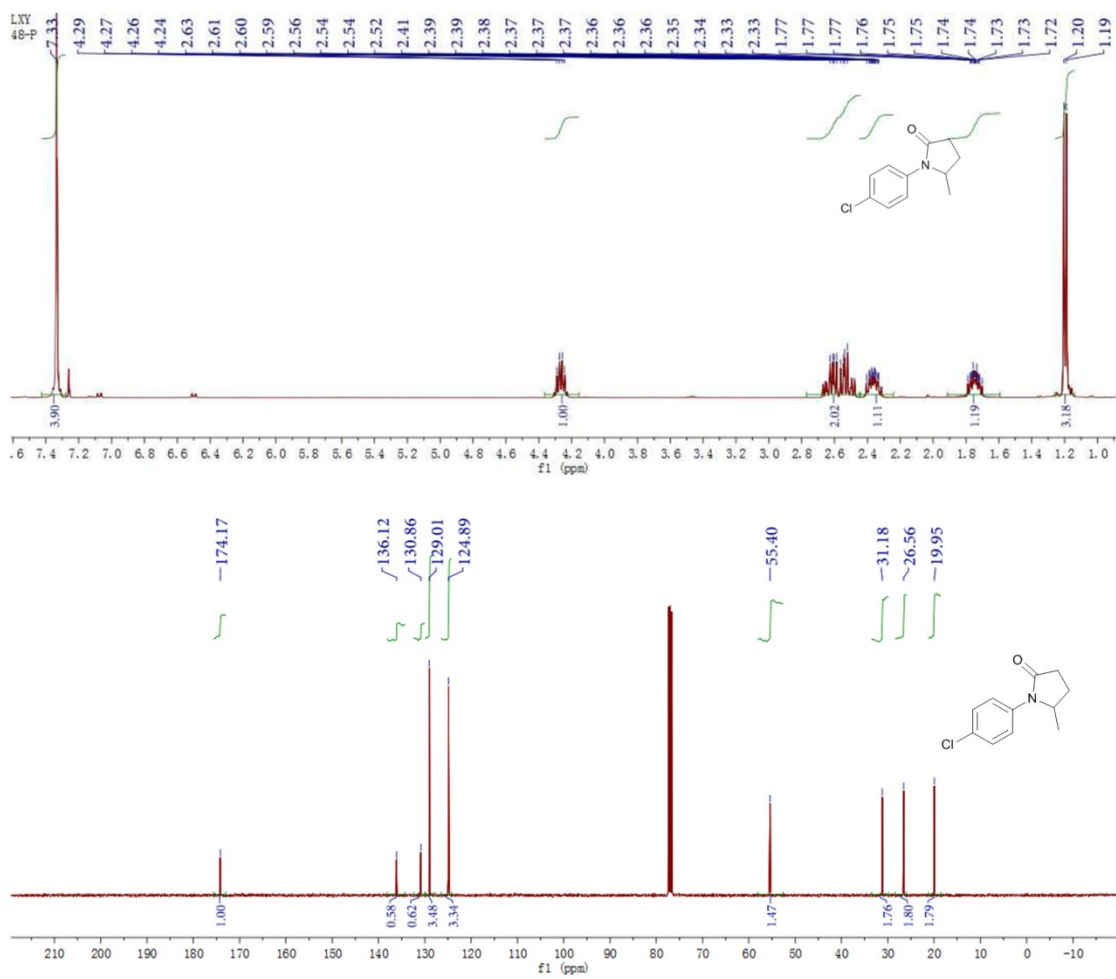

**Figure S7**  $^1\text{H}$  (top) and  $^{13}\text{C}$  (bottom) NMR spectra of 1-(4-chlorophenyl)-5-methylpyrrolidin-2-one

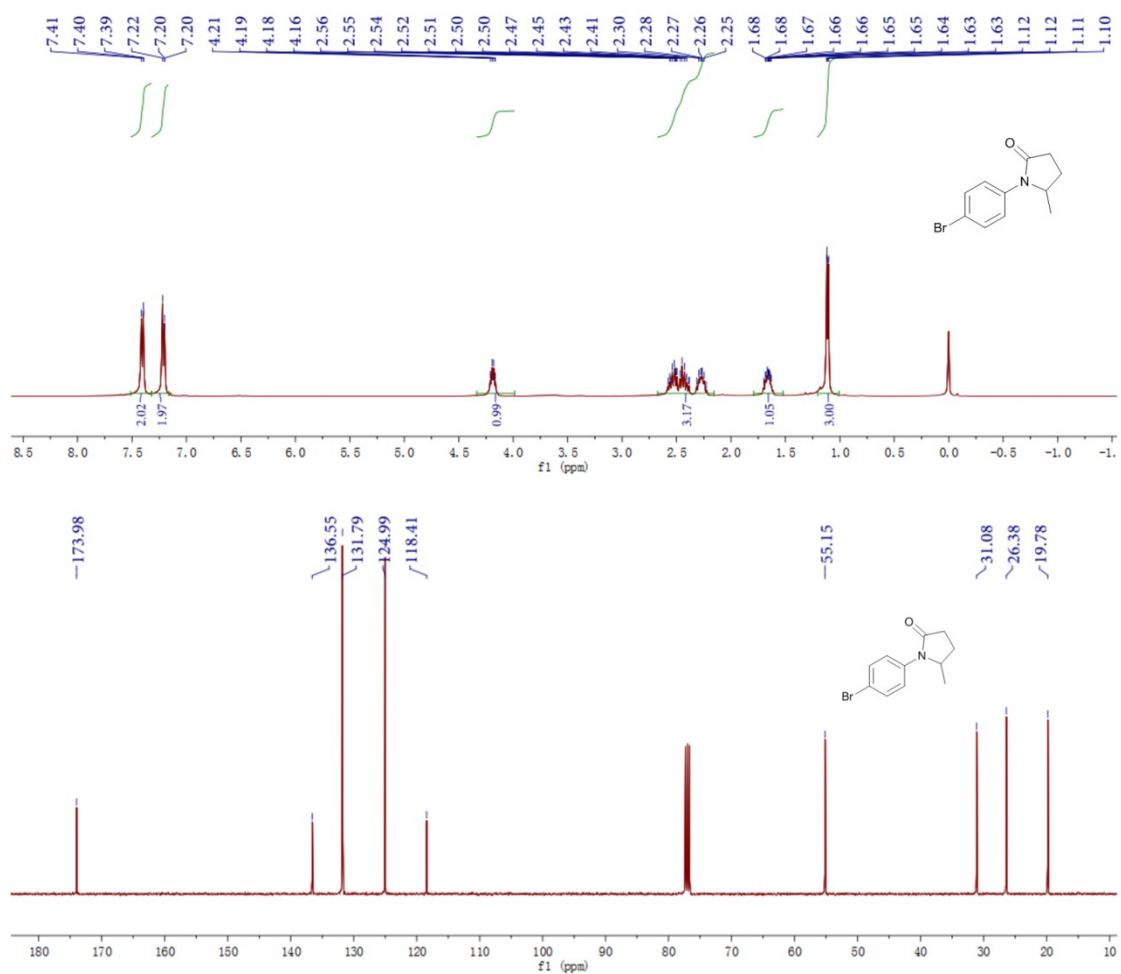

**Figure S8**  $^1\text{H}$  (top) and  $^{13}\text{C}$  (bottom) NMR spectra of 1-(4-bromophenyl)-5-methylpyrrolidin-2-one

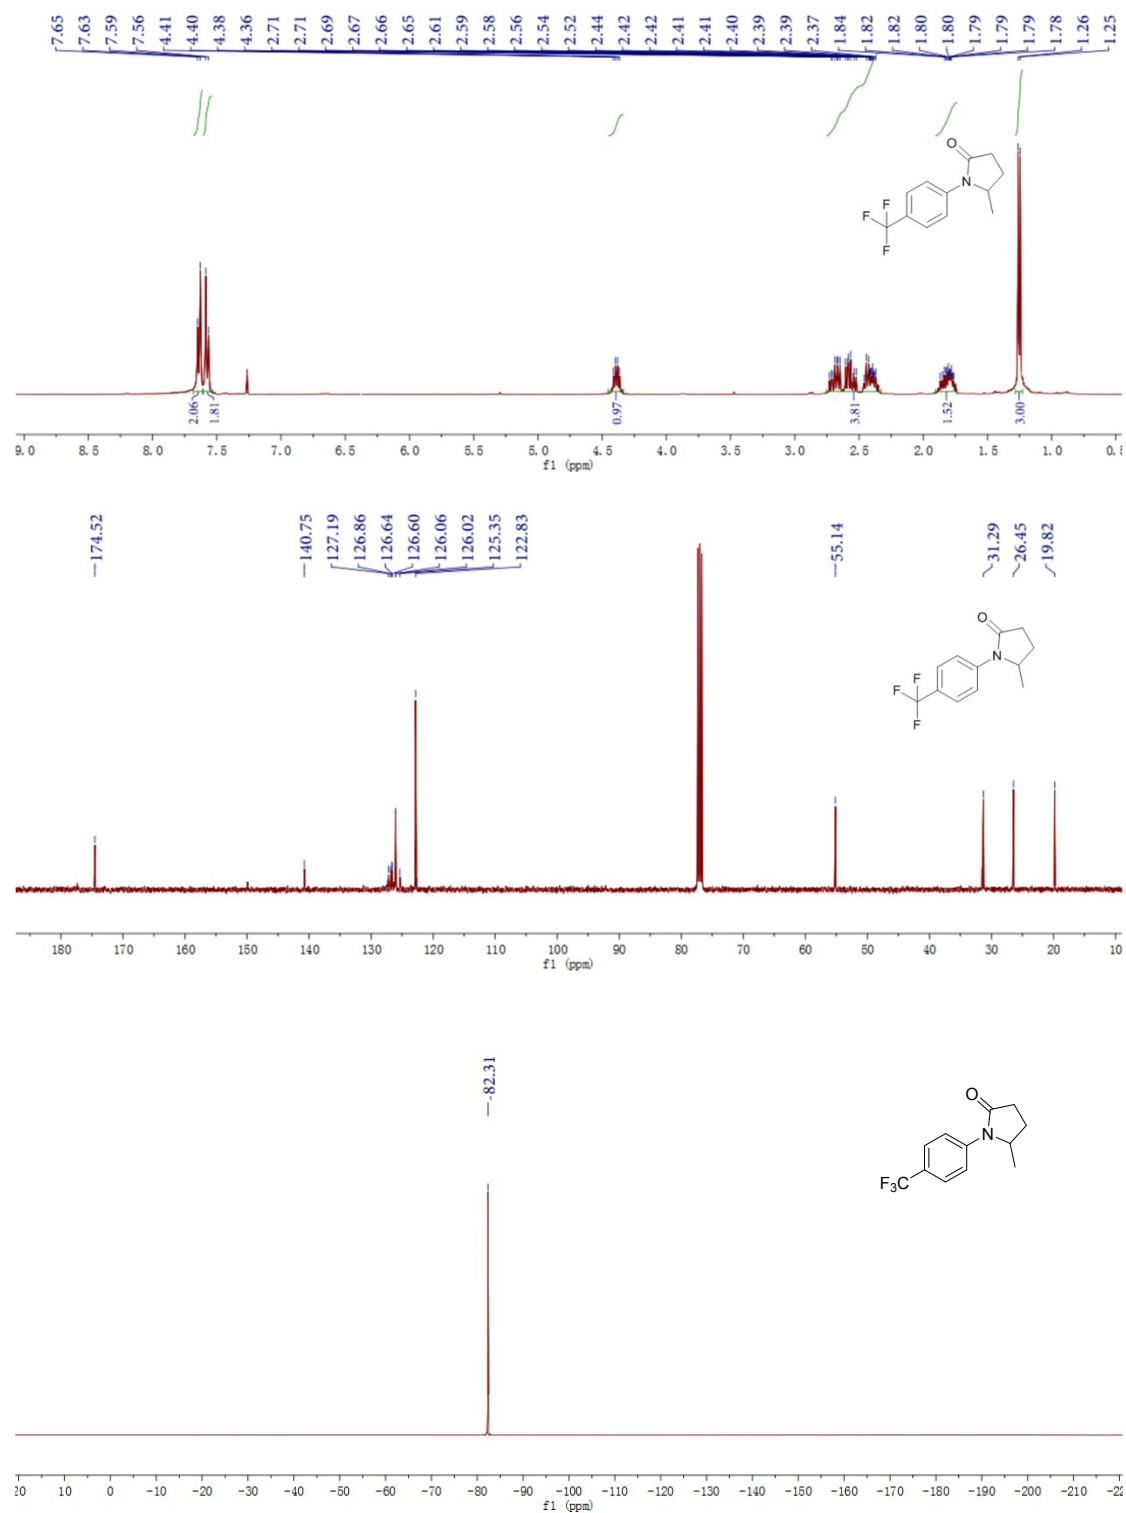

**Figure S9**  $^1\text{H}$  (top),  $^{13}\text{C}$  (middle) and  $^{19}\text{F}$  (bottom) NMR spectra of 5-methyl-1-(4-(trifluoromethyl)phenyl)pyrrolidin-2-one

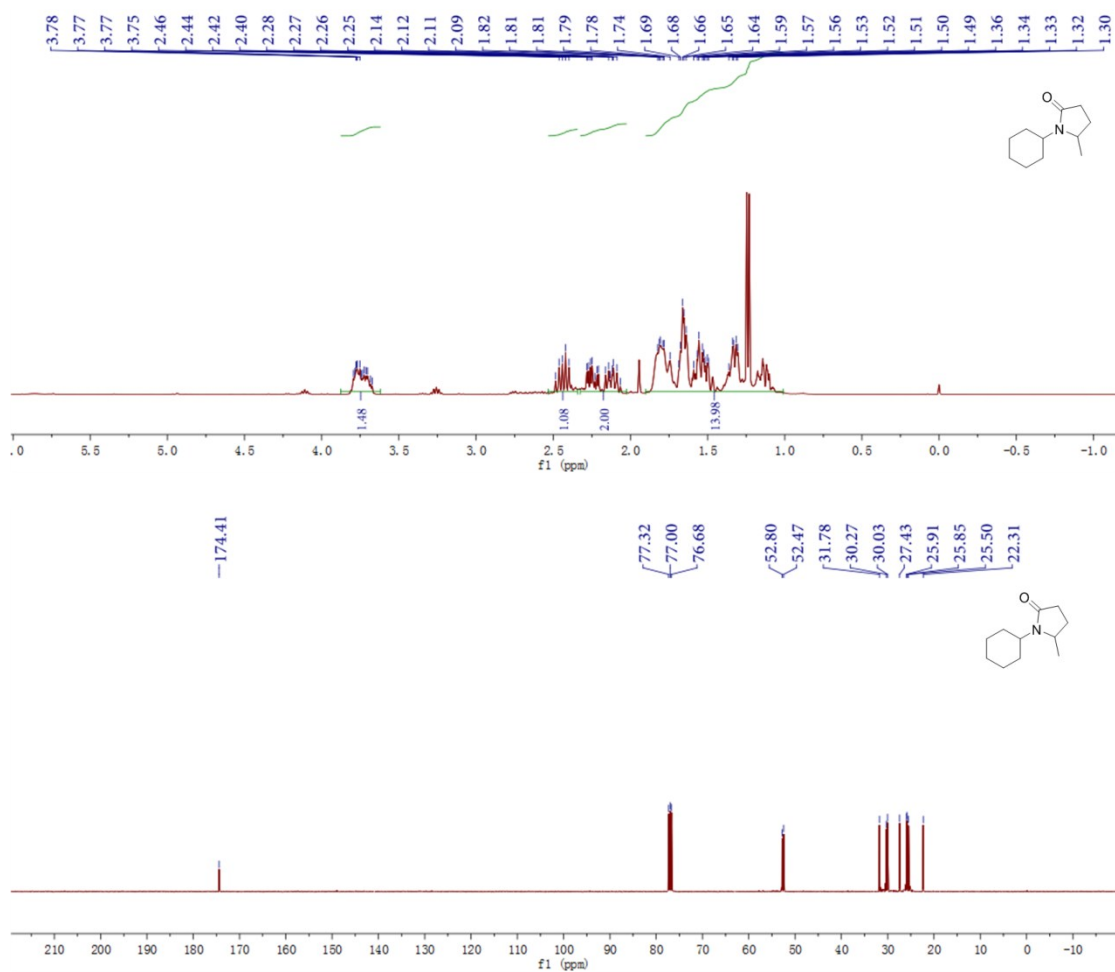

**Figure S10**  $^1\text{H}$  (top) and  $^{13}\text{C}$  (bottom) NMR spectra of 1-cyclohexyl-5-methylpyrrolidin-2-one

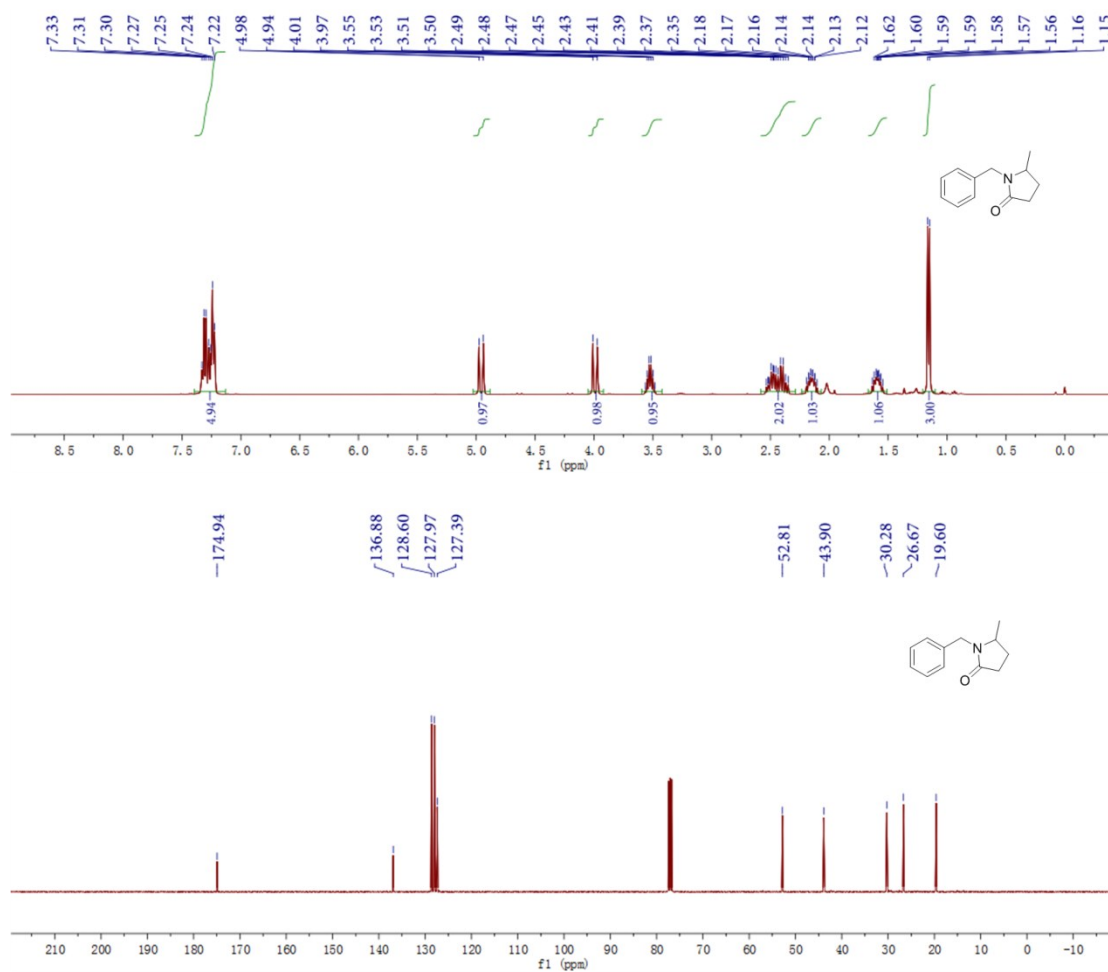

**Figure S11**  $^1\text{H}$  (top) and  $^{13}\text{C}$  (bottom) NMR spectra of 1-benzyl-5-methylpyrrolidin-2-one

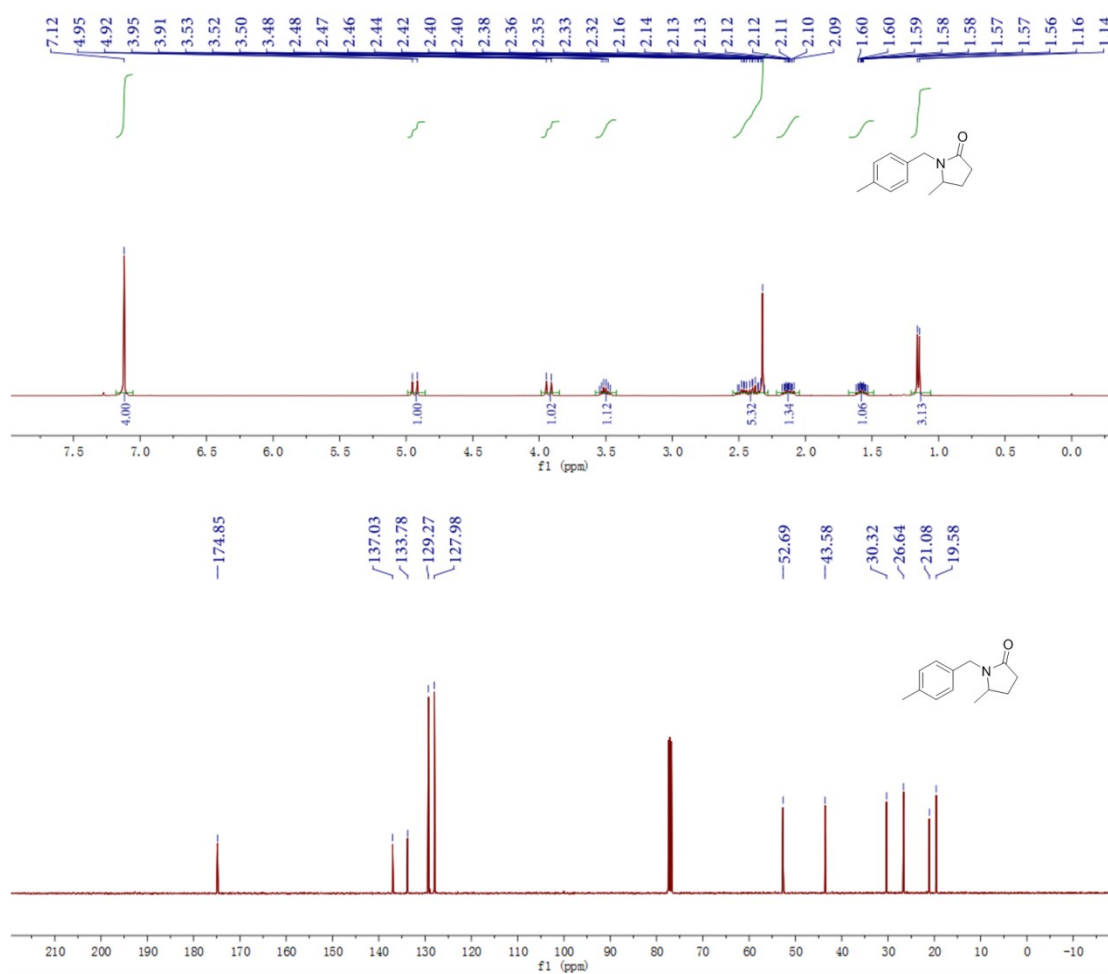

**Figure S12**  $^1\text{H}$  (top) and  $^{13}\text{C}$  (bottom) NMR spectra of 5-methyl-1-(4-methylbenzyl)pyrrolidin-2-one

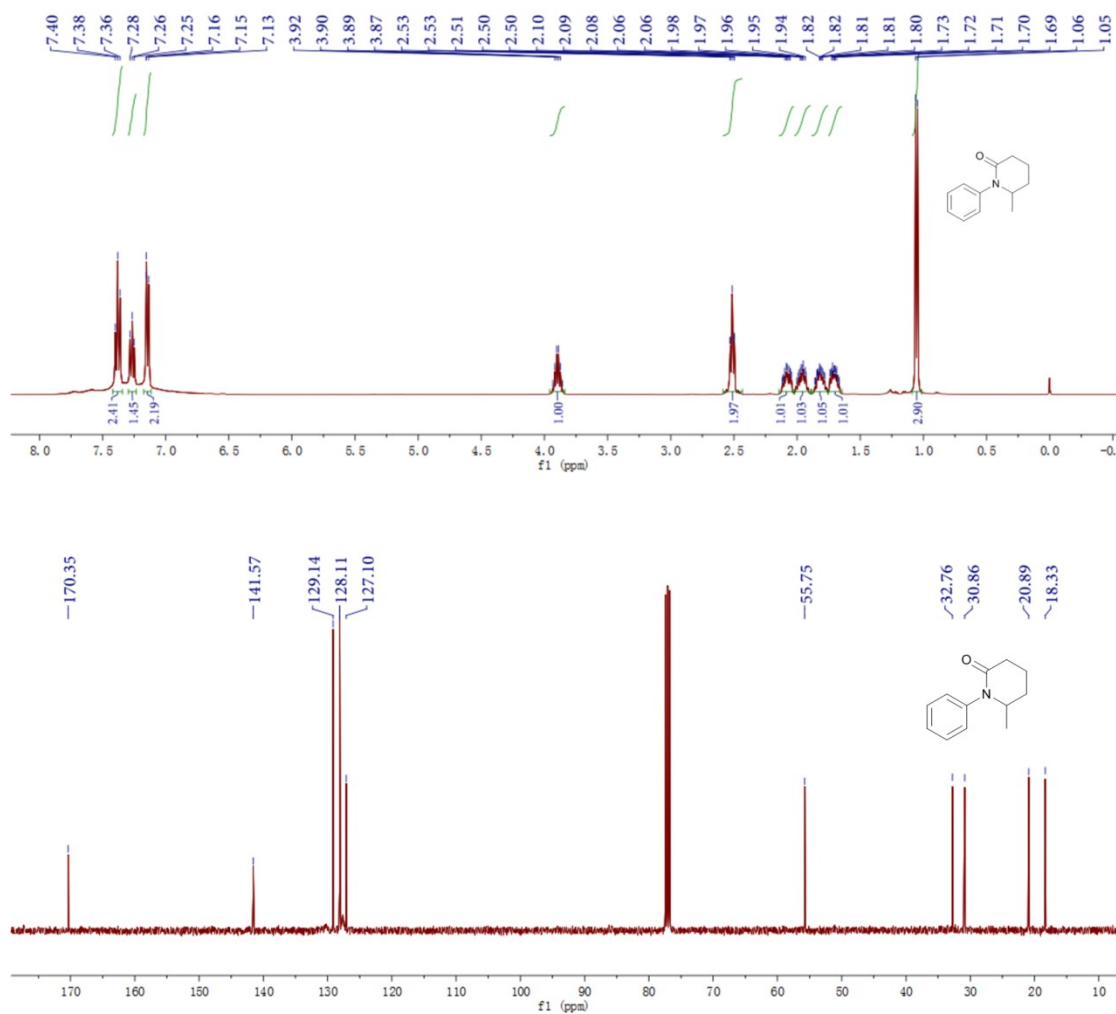

Figure S13  $^1\text{H}$  (top) and  $^{13}\text{C}$  (bottom) NMR spectra of 6-methyl-1-phenylpiperidin-2-one

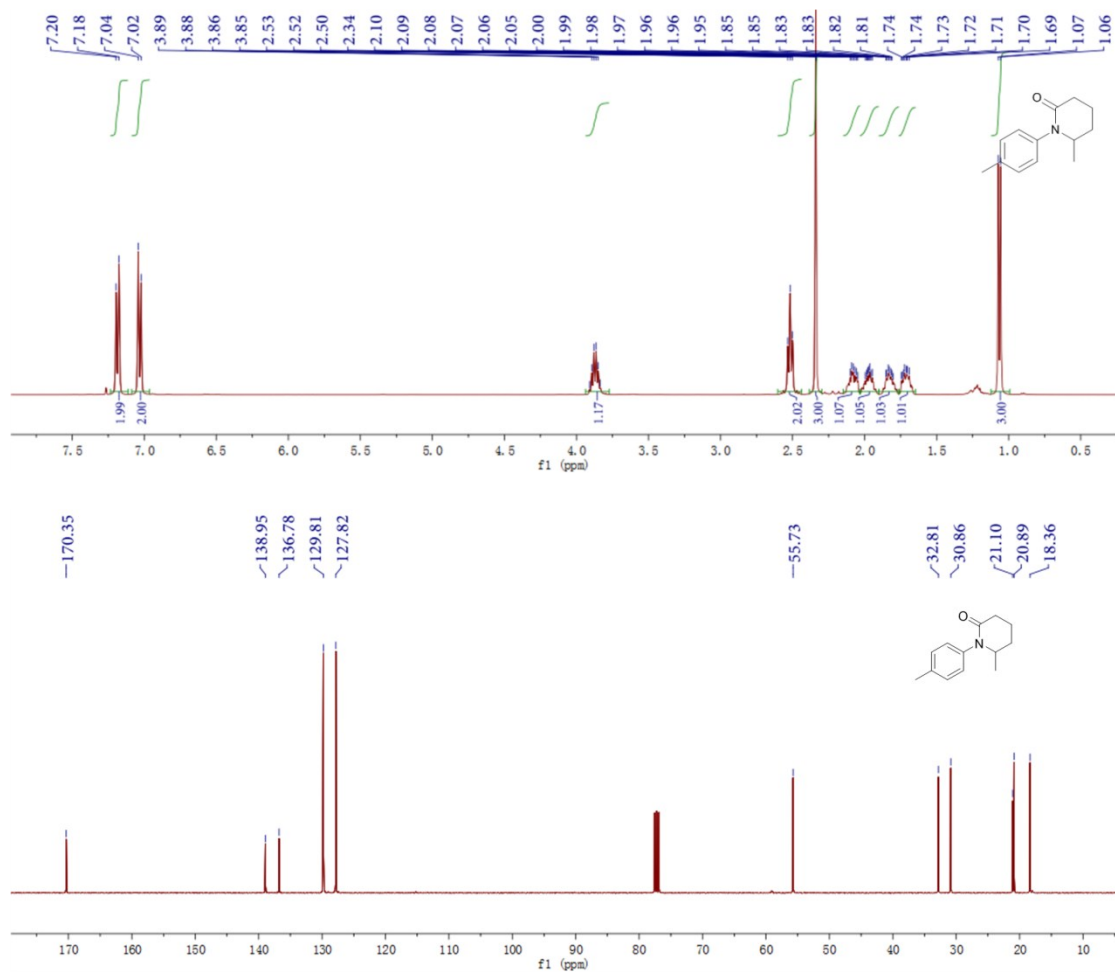

**Figure S14**  $^1\text{H}$  (top) and  $^{13}\text{C}$  (bottom) NMR spectra of 6-methyl-1-(p-tolyl)piperidin-2-one



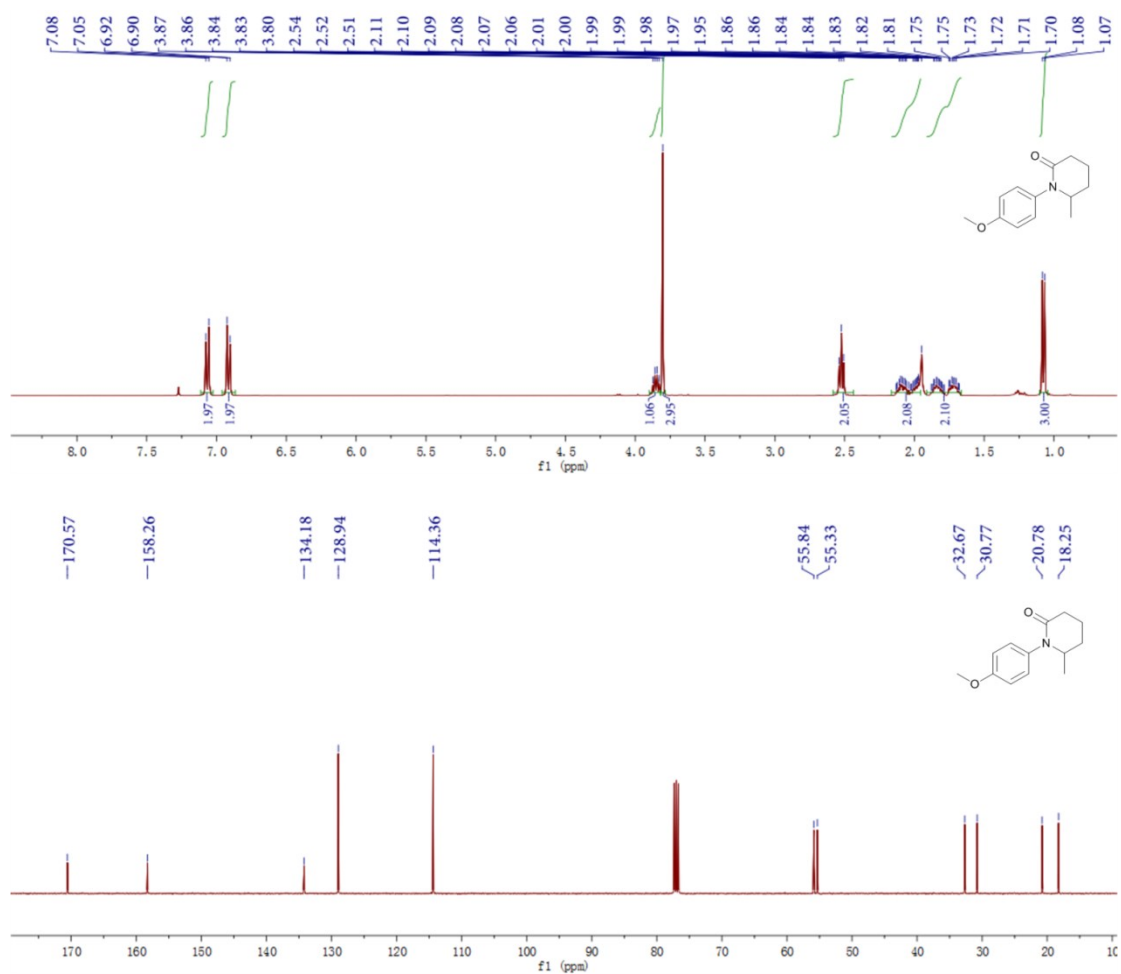

**Figure S15**  $^1\text{H}$  (top) and  $^{13}\text{C}$  (bottom) NMR spectra of 1-(4-methoxyphenyl)-6-methylpiperidin-2-one

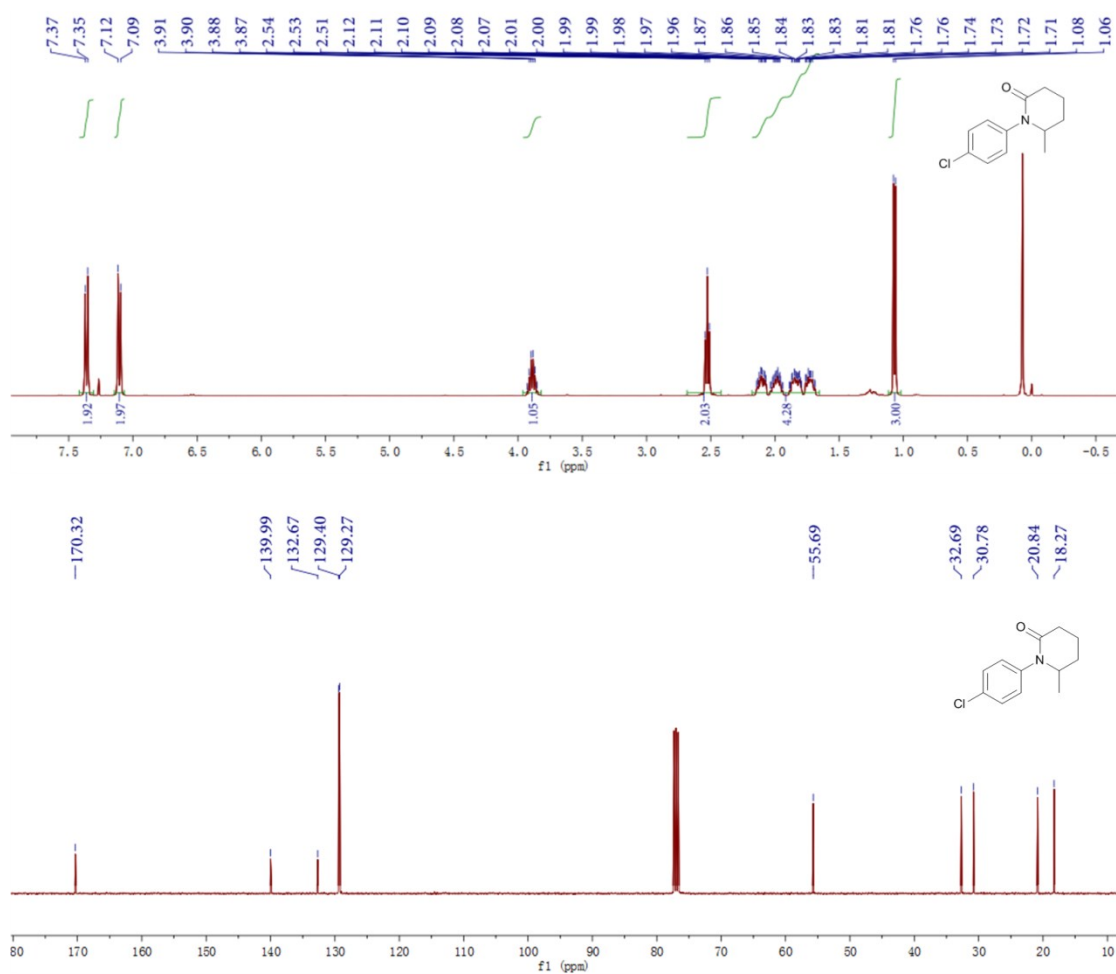

**Figure S16**  $^1\text{H}$  (top) and  $^{13}\text{C}$  (bottom) NMR spectra of 1-(4-chlorophenyl)-6-methylpiperidin-2-one

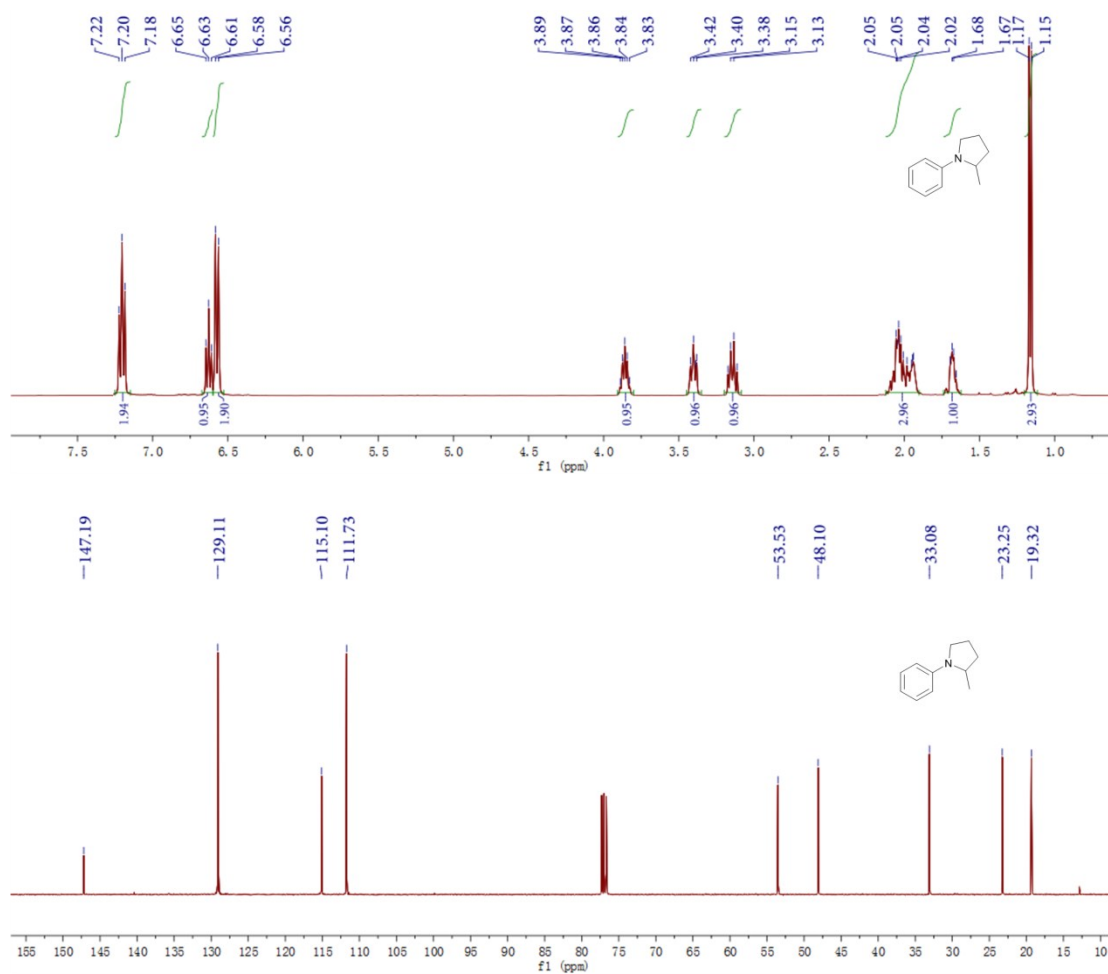

Figure S17  $^1\text{H}$  (top) and  $^{13}\text{C}$  (bottom) NMR spectra of 2-methyl-1-phenylpyrrolidine

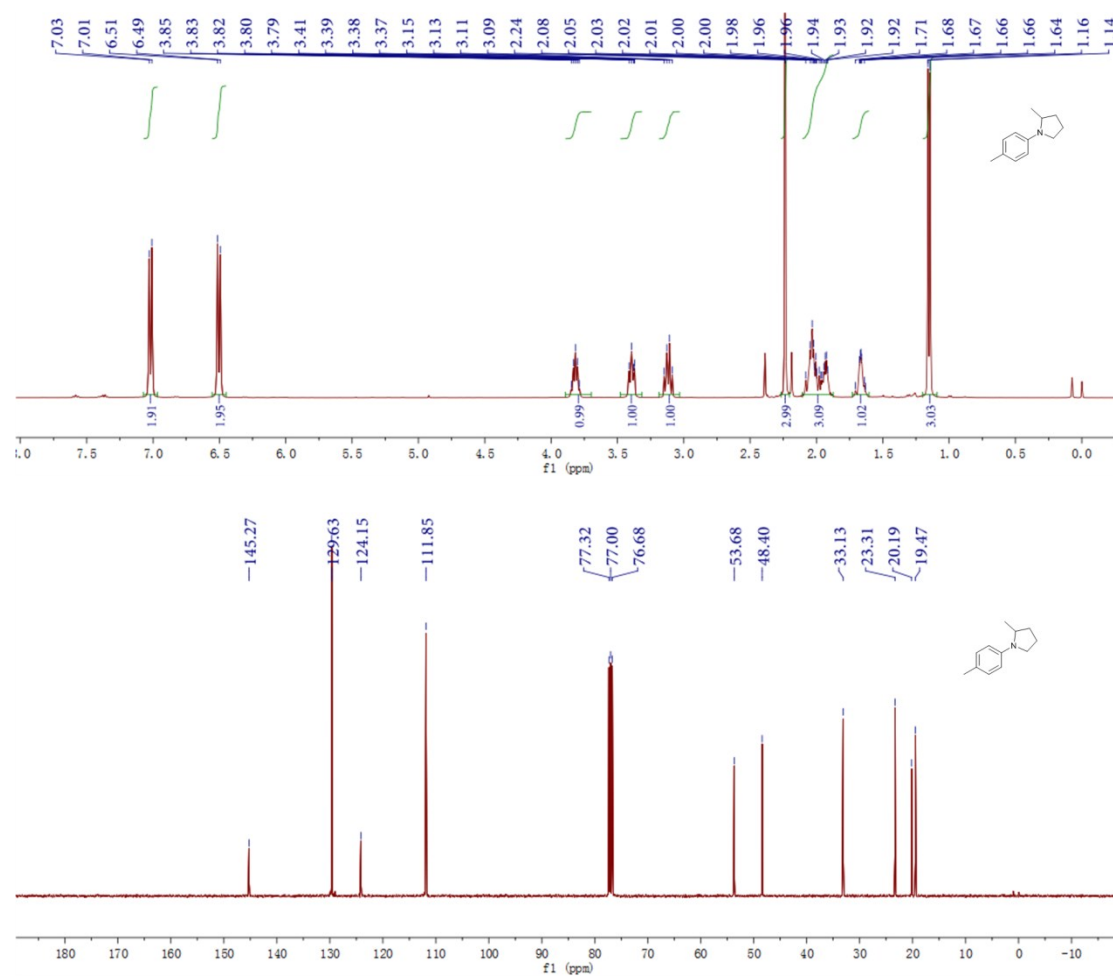

**Figure S18**  $^1\text{H}$  (top) and  $^{13}\text{C}$  (bottom) NMR spectra of 2-methyl-1-(p-tolyl)pyrrolidine

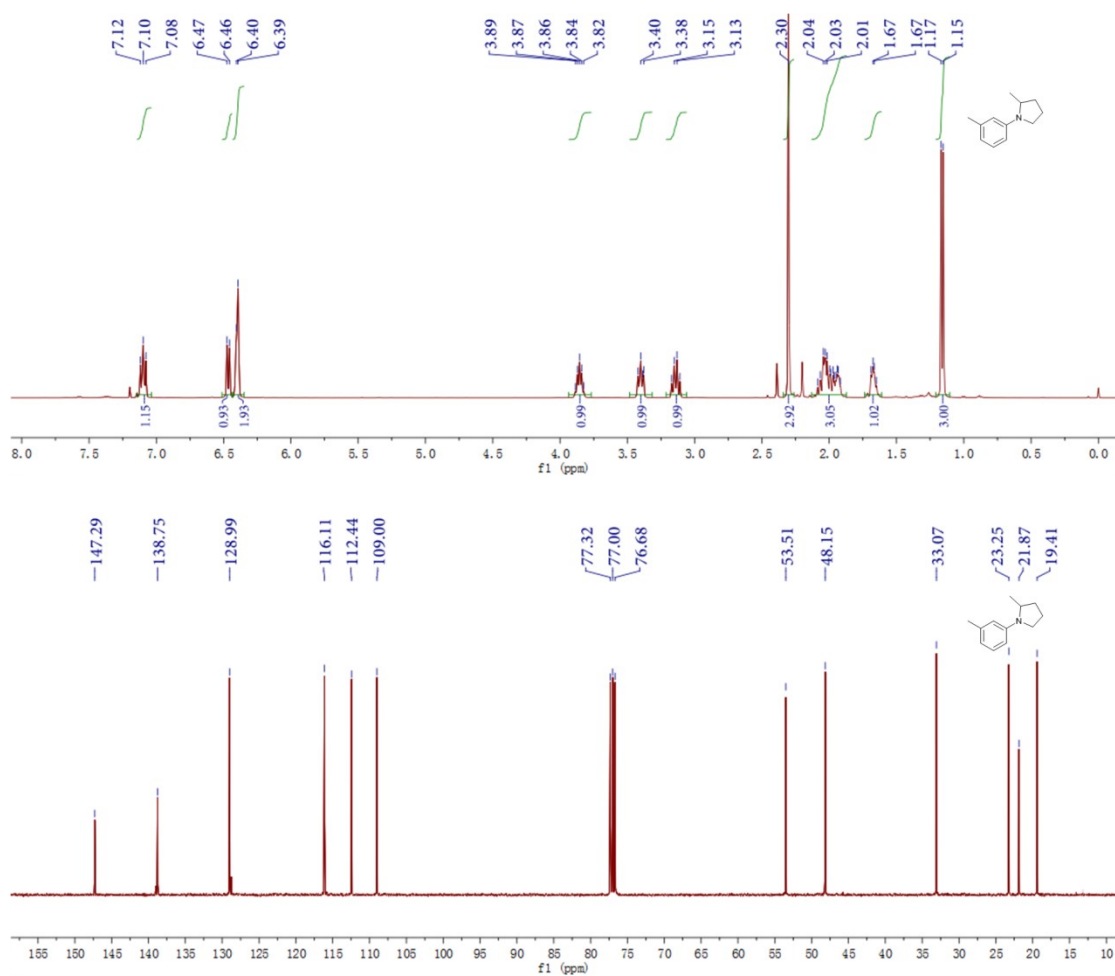

**Figure S19**  $^1\text{H}$  (top) and  $^{13}\text{C}$  (bottom) NMR spectra of 2-methyl-1-(m-tolyl)pyrrolidine

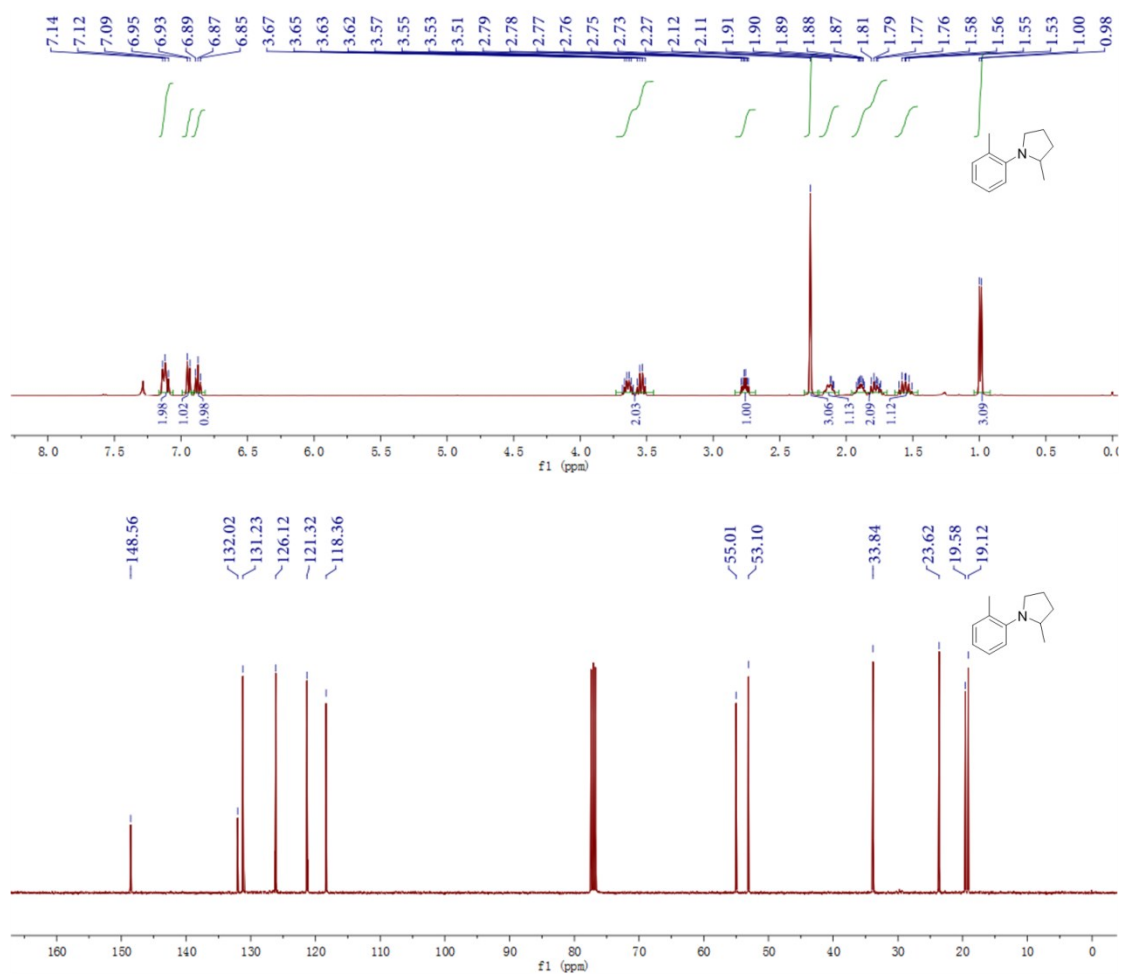

**Figure S20**  $^1\text{H}$  (top) and  $^{13}\text{C}$  (bottom) NMR spectra of 2-methyl-1-(o-tolyl)pyrrolidine

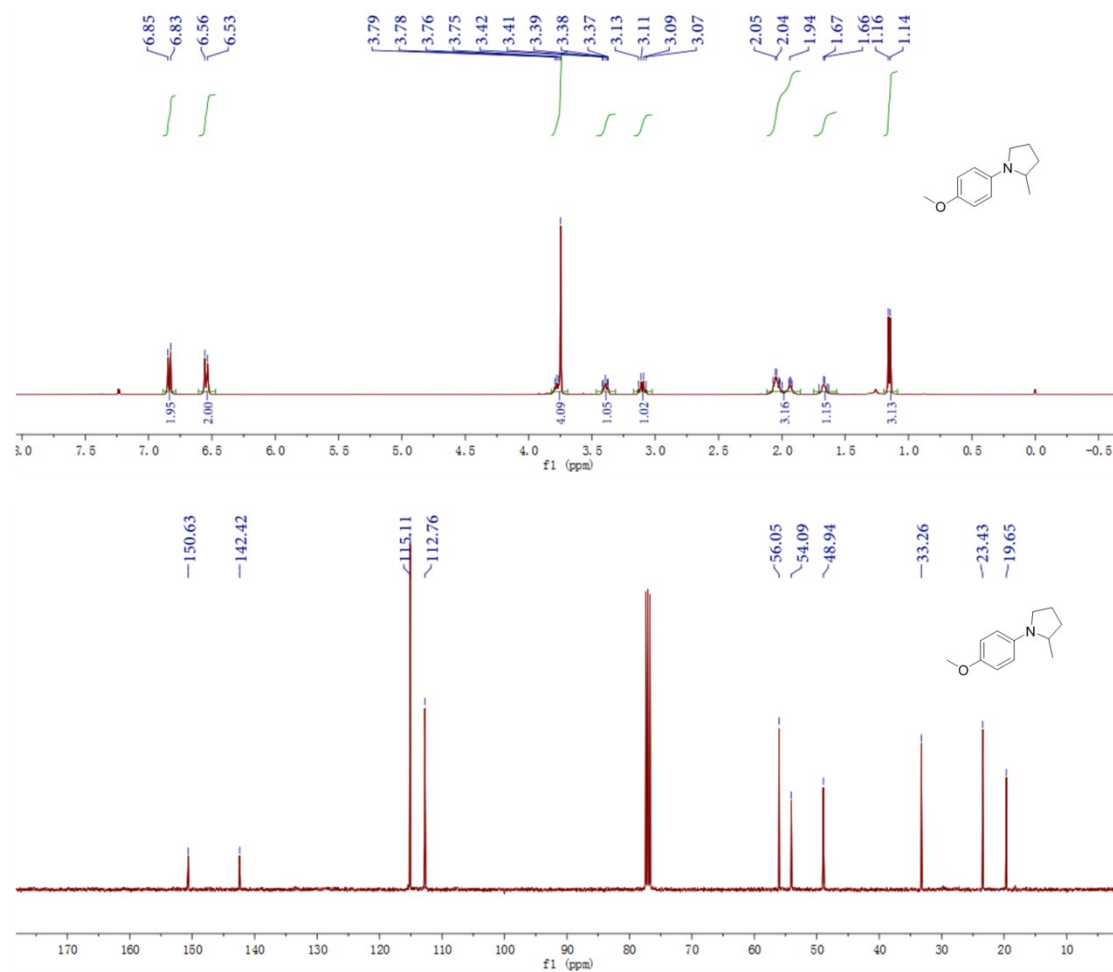

**Figure S21**  $^1\text{H}$  (top) and  $^{13}\text{C}$  (bottom) NMR spectra of 1-(4-methoxyphenyl)-2-methylpyrrolidine

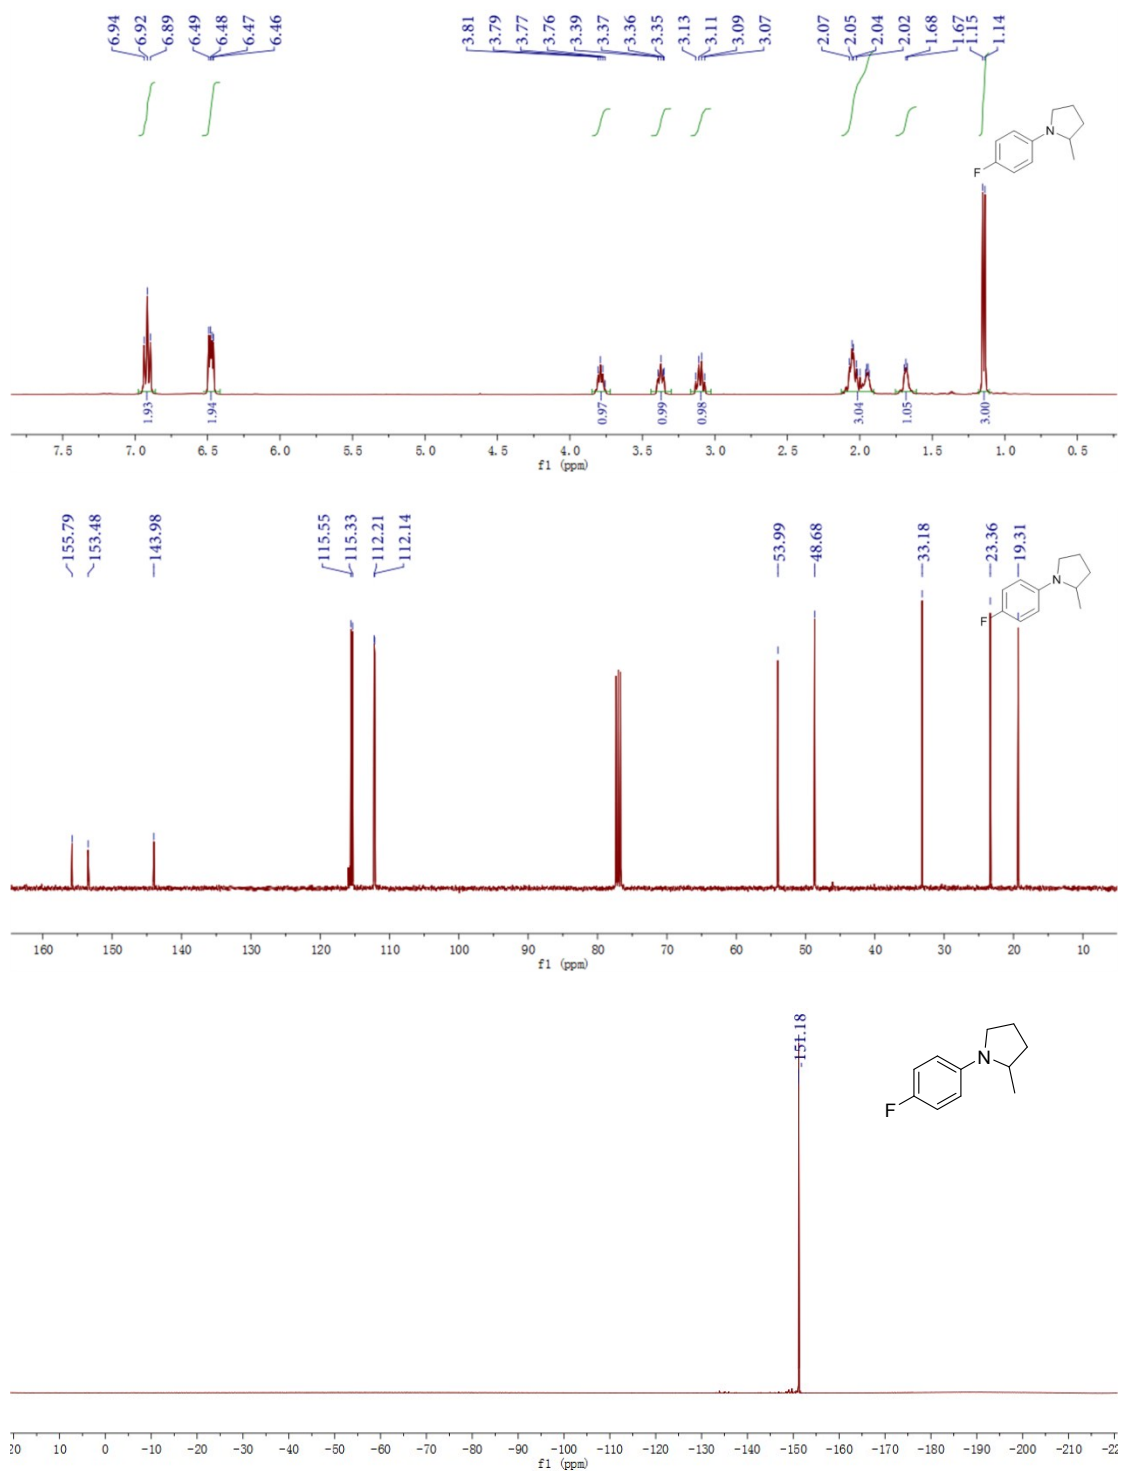

**Figure S22** <sup>1</sup>H (top), <sup>13</sup>C (middle) and <sup>19</sup>F (bottom) NMR spectra of 1-(4-fluorophenyl)-2-methylpyrrolidine



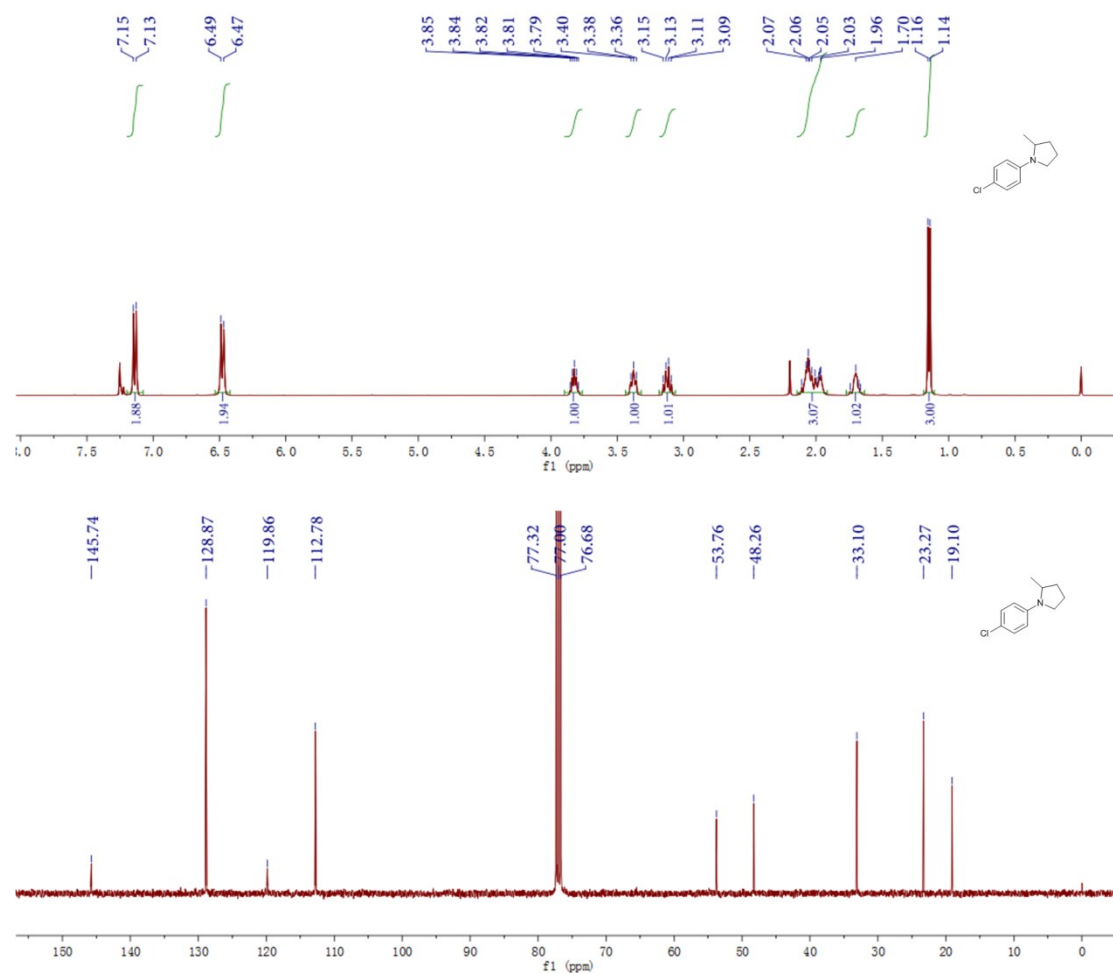

**Figure S23** <sup>1</sup>H (top) and <sup>13</sup>C (bottom) NMR spectra of N-(4-chlorophenyl)-2-methylpyrrolidine

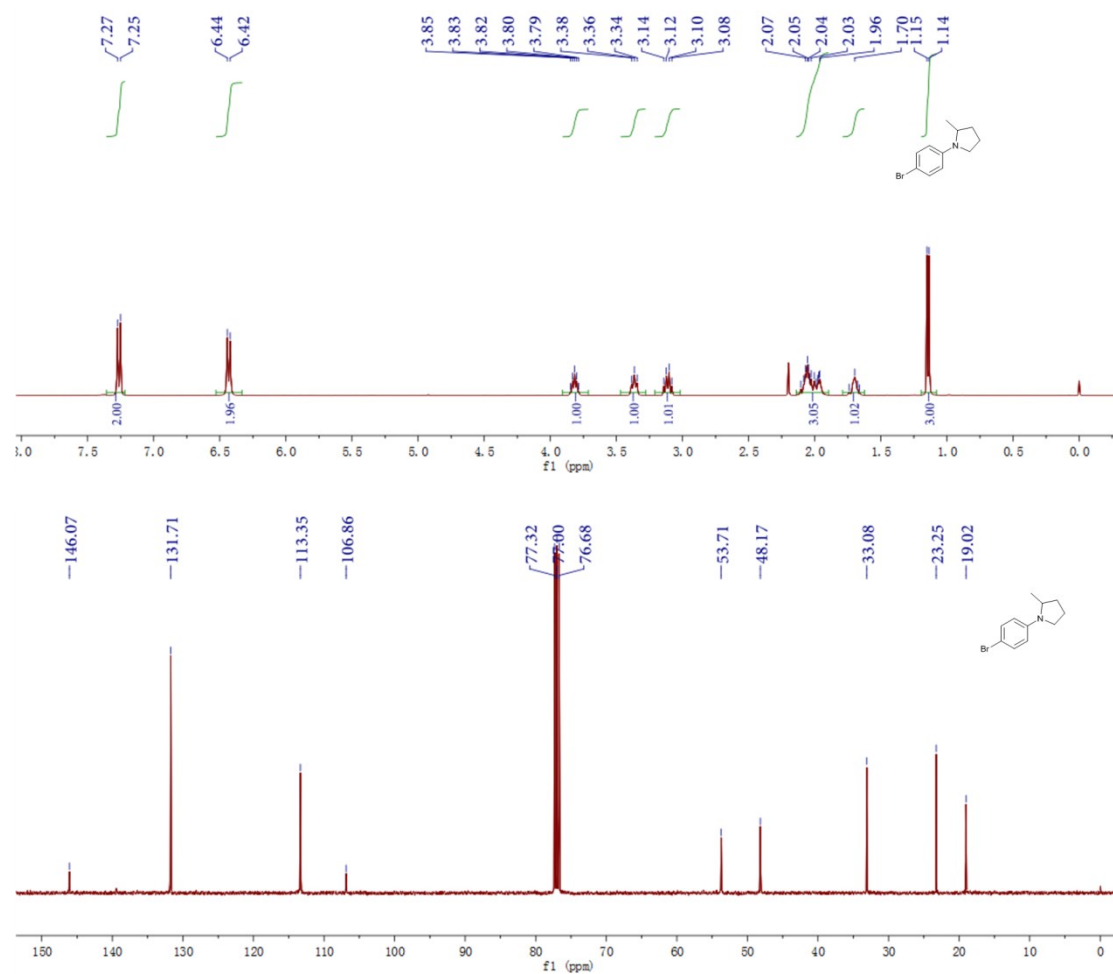

**Figure S24**  $^1\text{H}$  (top) and  $^{13}\text{C}$  (bottom) NMR spectra of 1-(4-bromophenyl)-2-methylpyrrolidine

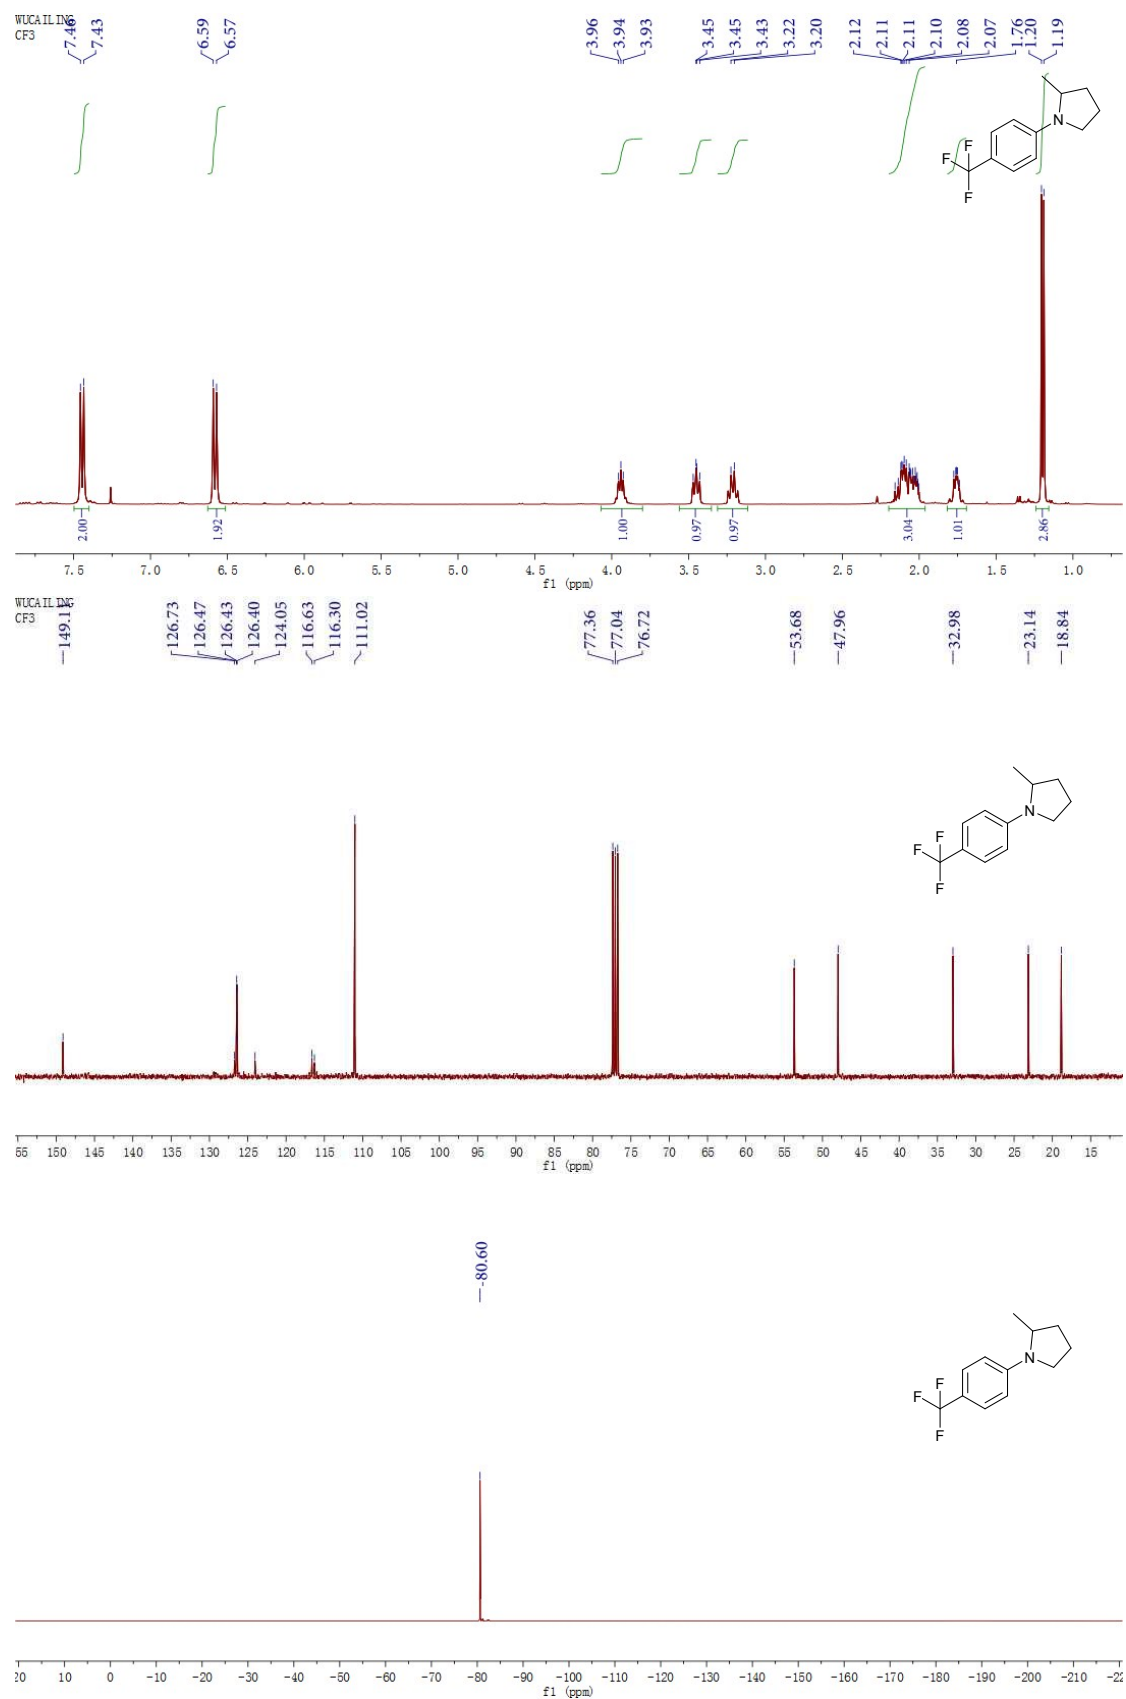

**Figure S25** <sup>1</sup>H (top), <sup>13</sup>C(middle) and <sup>19</sup>F (bottom) NMR spectra of 2-methyl-1-(4-(trifluoromethyl)phenyl)pyrrolidine

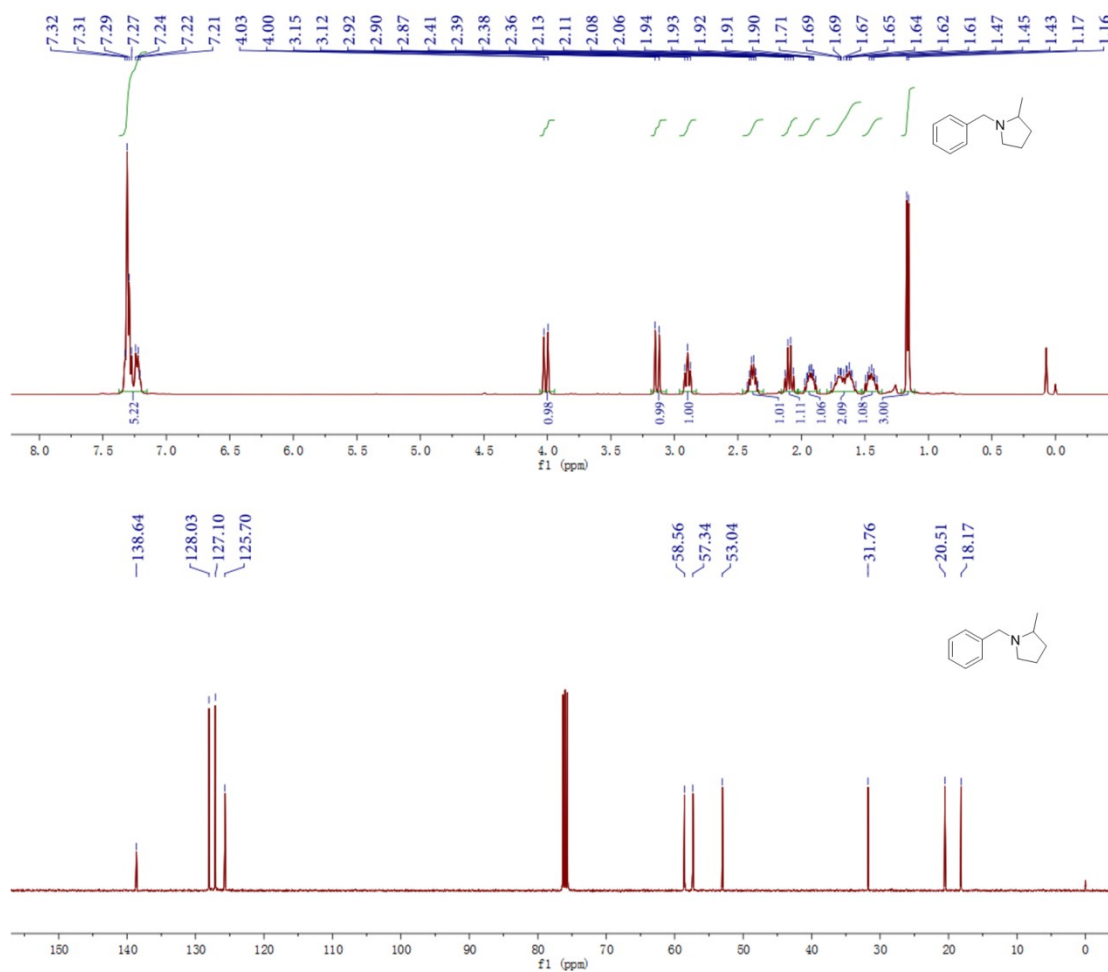

**Figure S26**  $^1\text{H}$  (top) and  $^{13}\text{C}$  (bottom) NMR spectra of 1-benzyl-2-methylpyrrolidine

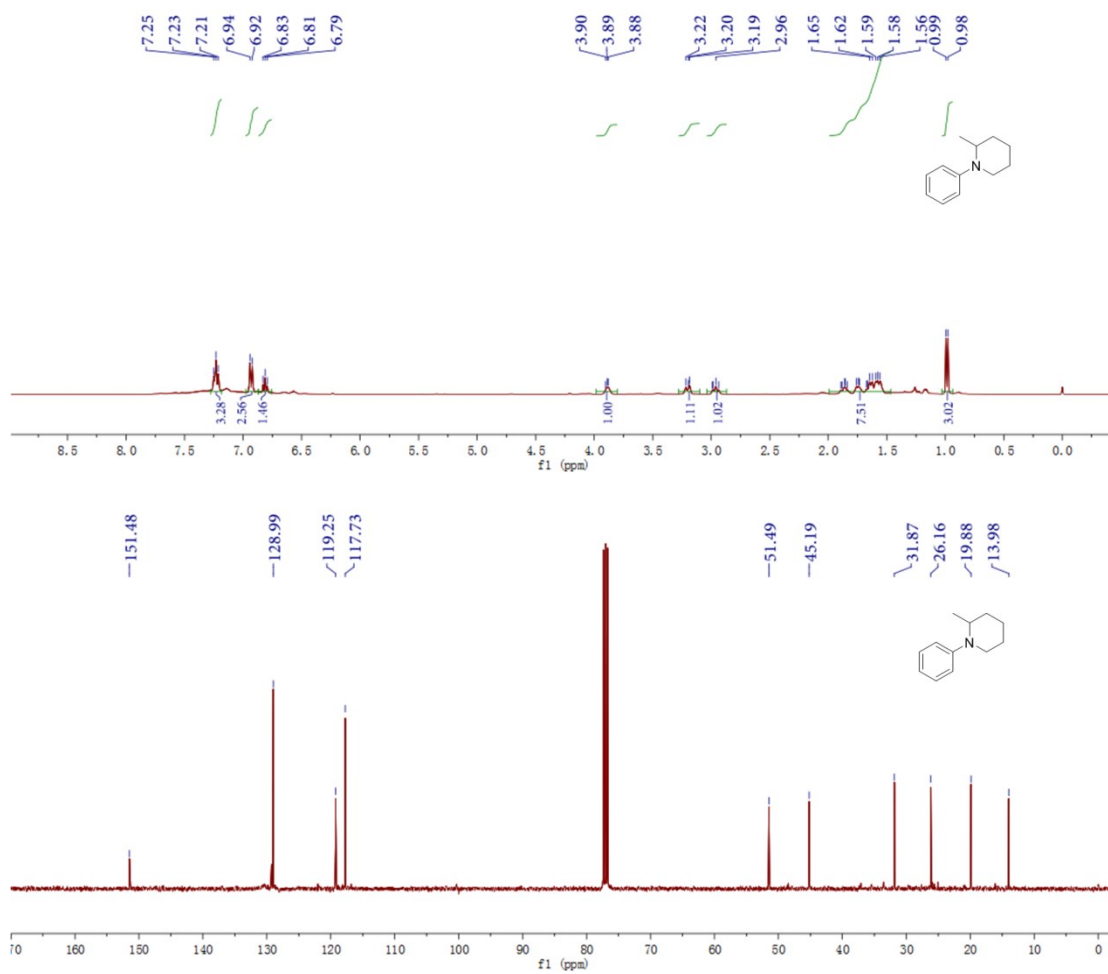

**Figure S27**  $^1\text{H}$  (top) and  $^{13}\text{C}$  (bottom) NMR spectra of 2-methyl-1-phenylpiperidine
